# Supplementary material for: Different “metabolomic niches” of the highly diverse tree species of the French Guiana rainforests
Source: PubMed Central journal article supplement (PMC7181821; doi:10.1038/s41598-020-63891-y), 2020-04-24
Supplement: 41598_2020_63891_MOESM1_ESM.pdf [file 41598_2020_63891_MOESM1_ESM.pdf]

Different “metabolomic niches” of the highly diverse tree species of the French Guiana rainforests

Albert Gargallo-Garriga<sup>1,2,3\*</sup>, Jordi Sardans<sup>1,2</sup>, Victor Granda<sup>1,2</sup>, Joan Llusà<sup>2,3</sup>, Guille Peguero<sup>1,2,4</sup>, Dolores Asensio<sup>2,3</sup>, Romà Ogaya<sup>2,3</sup>, Ifigenia Urbina<sup>2,3</sup>, Leandro Van Langenhove<sup>4</sup>, Lore T. Verryckt<sup>4</sup>, Jérôme Chave, Elodie A. Courtois<sup>4,5</sup>, Clément Stahl<sup>6</sup>, Oriol Grau<sup>1,2</sup>, Karel Klem<sup>3</sup>, Otmar Urban<sup>3</sup>, Ivan A. Janssens<sup>4</sup>, Josep Peñuelas<sup>1,2</sup>.

<sup>1</sup>CSIC, Global Ecology Unit CREAM-CEBAB-CSIC-UAB, Bellaterra 08193, Catalonia, Spain. <sup>2</sup>CREAF, Cerdanyola del vallès 08193, Catalonia, Spain. <sup>3</sup>Global Change Research Institute, Czech Academy of Sciences, Bělidla 986/4a, CZ-60300 Brno, Czech Republic. <sup>4</sup>University of Antwerp, Department of Biology, BE-2610 Wilrijk, Belgium, <sup>5</sup>Laboratoire Ecologie, évolution, interactions des systèmes amazoniens (LEEISA), Université de Guyane, CNRS, IFREMER, 97300 Cayenne, French Guiana, <sup>6</sup>INRA, UMR EcoFoG, CNRS, Cirad, AgroParisTech, Université des Antilles, Université de Guyane, 97310 Kourou, France.

Table S1. Metabolites that were defined after the comparison with our standard compound library or by a matching of MS/MS data were considered to be reliably identified using the KEGG and MASSBANK platforms.

| Detection | MS     | RT            | Comp_code          | Comp_name                             |
|-----------|--------|---------------|--------------------|---------------------------------------|
| Int. Sta. | 106.05 | 1.46          | [M+H] <sup>+</sup> | Arginine                              |
| Int. Sta. | 90.05  | 1.47          | [M+H] <sup>+</sup> | Asparagine                            |
| Int. Sta. | 175.12 | 1.47          | [M+H] <sup>+</sup> | Aspartic acid                         |
| Int. Sta. | 116.07 | 1.43          | [M+H] <sup>+</sup> | Glutamic acid                         |
| Int. Sta. | 118.09 | 1.34          | [M+H] <sup>+</sup> | Glutamine                             |
| Int. Sta. | 132.1  | 1.49          | [M+H] <sup>+</sup> | Glycine                               |
| Int. Sta. | 132.1  | 1.53          | [M+H] <sup>+</sup> | Histidine                             |
| Int. Sta. | 147.08 | 1.7           | [M+H] <sup>+</sup> | Isoleucine                            |
| Int. Sta. | 150.06 | 1.76          | [M+H] <sup>+</sup> | Leucine                               |
| Int. Sta. | 147.11 | 1.46          | [M+H] <sup>+</sup> | Lysine                                |
| Int. Sta. | 166.09 | 1.59          | [M+H] <sup>+</sup> | Methionine                            |
| Int. Sta. | 182.08 | 1.32          | [M+H] <sup>+</sup> | Phenilalanine                         |
| Int. Sta. | 205.1  | 1.91          | [M+H] <sup>+</sup> | Proline                               |
| Int. Sta. | 117.02 | 1.54 a 1.77   | [M+H] <sup>+</sup> | Serine                                |
| Int. Sta. | 193.05 | 2.49          | [M+H] <sup>+</sup> | Threonine                             |
| Int. Sta. | 193.03 | 1.74, 1.78    | [M-H] <sup>-</sup> | Tryptofan                             |
| Int. Sta. | 163.04 | 10.57         | [M-H] <sup>-</sup> | Tyrosine                              |
| Int. Sta. | 193.07 | 1.75          | [M+H] <sup>+</sup> | Valine                                |
| Int. Sta. | 87.05  | 11.29         | [M-H] <sup>-</sup> | Adenine                               |
| Int. Sta. | 187.04 | 1.51          | [M+H] <sup>+</sup> | Adenosine                             |
| Int. Sta. | 155.14 | 7.71          | [M-H] <sup>-</sup> | Guanine                               |
| Int. Sta. | 169.04 | 11.29         | [M+H] <sup>+</sup> | α-Ketoglutaric acid                   |
| Int. Sta. | 171.02 | 16.63         | [M+H] <sup>+</sup> | Chlorogenic acid(-)                   |
| Int. Sta. | 117.07 | 4.65          | [M+H] <sup>+</sup> | Citric acid (anhydrous)               |
| Int. Sta. | 115.06 | 1,55 a 1,83   | [M+H] <sup>+</sup> | L-(-)-Malic acid                      |
| Int. Sta. | 106.05 | 8.96          | [M+H] <sup>+</sup> | Lactic acid                           |
| Int. Sta. | 168.07 | 9.63          | [M+H] <sup>+</sup> | Pyruvic acid                          |
| Int. Sta. | 149.06 | 1.47          | [M+H] <sup>+</sup> | Succinic acid                         |
| Int. Sta. | 181.06 | 1,42 and 1,64 | [M-H] <sup>-</sup> | Tartaric acid                         |
| Int. Sta. | 193.03 | 14.28         | [M+H] <sup>+</sup> | Abscisic acid (ABA)                   |
| Int. Sta. | 193.07 | 4.82          | [M+H] <sup>+</sup> | Ascorbic acid                         |
| Int. Sta. | 217.05 | 1.75          | [M+H] <sup>+</sup> | Pantothenic acid hemicalcium salt     |
| Int. Sta. | 199.06 | 1.51          | [M+H] <sup>+</sup> | (+)-Catechin hydrate (anhydrous)      |
| Int. Sta. | 282.08 | 10.57         | [M+H] <sup>+</sup> | 3-coumaric acid                       |
| Int. Sta. | 211.13 | 4.9           | [M+H] <sup>+</sup> | 5,7-dihydroxy-3,4,5-trimethoxyflavone |
| Int. Sta. | 355.08 | 1,46 and 1,77 | [M-H] <sup>-</sup> | Acacetin                              |
| Int. Sta. | 265.14 | 14.81         | [M+H] <sup>+</sup> | D-Pinitol                             |
| Int. Sta. | 149.05 | 3,11          | [M+H] <sup>+</sup> | Epicatechin                           |
| Int. Sta. | 305.06 | 13.57         | [M+H] <sup>+</sup> | Epigallocatechin                      |
| Int. Sta. | 113.03 | 1.44          | [M-H] <sup>-</sup> | Gallic acid                           |
| Int. Sta. | 136.06 | 11,09         | [M+H] <sup>+</sup> | Homoorientin                          |
| Int. Sta. | 243.1  | 1.5           | [M+H] <sup>+</sup> | Isovitexin                            |
| Int. Sta. | 268.1  | 1,42 and 1,77 | [M+H] <sup>+</sup> | Kaempferol                            |

|           |        |               |                    |                              |
|-----------|--------|---------------|--------------------|------------------------------|
| Int. Sta. | 149.05 | 1,48 and 1,81 | [M+H] <sup>+</sup> | Luteolin                     |
| Int. Sta. | 149.05 | 1,49 and 1,75 | [M+H] <sup>+</sup> | Myricetin                    |
| Int. Sta. | 191.02 | 1.43          | [M-H] <sup>-</sup> | Protocatechuic acid          |
| Int. Sta. | 149.05 | 1.44          | [M-H] <sup>-</sup> | Quercetin                    |
| Int. Sta. | 149.05 | 1.77          | [M-H] <sup>-</sup> | Quinic acid                  |
| Int. Sta. | 87.01  | 1.42          | [M-H] <sup>-</sup> | Sinapic acid                 |
| Int. Sta. | 179.06 | 1.43          | [M-H] <sup>-</sup> | Sodium salicylate            |
| Int. Sta. | 87.01  | 1.65          | [M-H] <sup>-</sup> | Syringic acid                |
| Int. Sta. | 353.09 | 1.44          | [M-H] <sup>-</sup> | trans-Ferulic acid           |
| Int. Sta. | 229.09 | 1.65          | [M-H] <sup>-</sup> | Vanillic acid                |
| Int. Sta. | 285.08 | 3.11          | [M-H] <sup>-</sup> | D-(-)-Lyxose                 |
| Int. Sta. | 287.06 | 13.09         | [M+H] <sup>+</sup> | D-(+)-Raffinose pentahydrate |
| Int. Sta. | 291.09 | 16.87         | [M+H] <sup>+</sup> | D-(+)-Sorbose                |
| Int. Sta. | 303.05 | 14.82         | [M+H] <sup>+</sup> | D-(+)-Trehalose dihydrate    |
| Int. Sta. | 307.08 | 4,93 a 5,20   | [M+H] <sup>+</sup> | Humulene                     |
| Int. Sta. | 319.04 | 13.72         | [M+H] <sup>+</sup> | Terpinene                    |
| Int. Sta. | 151.06 | 1,54 a 2,64   | [M+H] <sup>+</sup> | Terpineol                    |
| Int. Sta. | 433.11 | 12.47         | [M+H] <sup>+</sup> | Caryophyllene oxide          |
| Int. Sta. | 449.11 | 1.45          | [M-H] <sup>-</sup> | Linalool                     |
| KEGG      | 132.1  | 860.98        | cpd:C21184         | (-)-5'-Demethylatein         |
| KEGG      | 272.25 | 1456.42       | cpd:C11878         | (-)-Abietadiene              |
| KEGG      | 264.14 | 698           | cpd:C11060         | (-)-Abscisic acid            |
| KEGG      | 328    | 1061.01       | cpd:C10198         | (-)-Acanthocarpan            |
| KEGG      | 383    | 79.69         | cpd:C09462         | (-)-alpha-Hydrastine         |
| KEGG      | 264.2  | 1332.51       | cpd:C09036         | (-)-Apparicine               |
| KEGG      | 159.09 | 94.63         | cpd:C08269         | (-)-Betonicine               |
| KEGG      | 330.1  | 88.19         | cpd:C03040         | (-)-Bisdechlorogeodin        |
| KEGG      | 267.1  | 108.64        | cpd:C09368         | (-)-Caaverine                |
| KEGG      | 360.16 | 820.68        | cpd:C20454         | (-)-Lariciresinol            |
| KEGG      | 432    | 1721.51       | cpd:C16223         | (-)-Medicocarpin             |
| KEGG      | 156    | 1760.37       | cpd:C00400         | (-)-Menthol                  |
| KEGG      | 286.08 | 87.15         | cpd:C10508         | (-)-Nissolin                 |
| KEGG      | 317.28 | 1101.62       | cpd:C10777         | (-)-Ormosanine               |
| KEGG      | 358.1  | 100.8         | cpd:C20455         | (-)-Pinoresinol              |
| KEGG      | 282.2  | 1144.39       | cpd:C09235         | (-)-Quebrachamine            |
| KEGG      | 193.11 | 1724.65       | cpd:C09640         | (-)-Salsoline                |
| KEGG      | 286.12 | 1000.68       | cpd:C10526         | (-)-Sativan                  |
| KEGG      | 300    | 1793.84       | cpd:C16228         | (-)-Sophorol                 |
| KEGG      | 326    | 1061.49       | cpd:C12260         | (-)-Tortuosamine             |
| KEGG      | 393.2  | 701.31        | cpd:C10620         | (-)-Tylocrebrine             |
| KEGG      | 344.1  | 144.44        | cpd:C10101         | (-)-Usnic acid               |
| KEGG      | 400.15 | 645.42        | cpd:C17845         | (+)-Aschantin                |
| KEGG      | 594.27 | 1129.79       | cpd:C11141         | (+)-Atherospermoline         |
| KEGG      | 325.13 | 109.85        | cpd:C09389         | (+)-Cassythicine             |
| KEGG      | 290    | 98.42         | cpd:C06562         | (+)-Catechin                 |
| KEGG      | 288.06 | 747.37        | cpd:C10415         | (+)-Dalbergioidin            |
| KEGG      | 370.1  | 633.32        | cpd:C17844         | (+)-Demethoxyaschantin       |
| KEGG      | 386.17 | 1029.07       | cpd:C10561         | (+)-Eudesmin                 |
| KEGG      | 340.13 | 813.65        | cpd:C10616         | (+)-Galbacin                 |
| KEGG      | 462    | 73.88         | cpd:C12254         | (+)-Plicamine                |

|      |        |         |            |                                                                                   |
|------|--------|---------|------------|-----------------------------------------------------------------------------------|
| KEGG | 313.26 | 1199.79 | cpd:C10167 | (+)-Prosopinine                                                                   |
| KEGG | 362.2  | 1091.82 | cpd:C20456 | (+)-Secoisolariciresinol                                                          |
| KEGG | 418.16 | 651.11  | cpd:C10889 | (+)-Syringaresinol                                                                |
| KEGG | 580.2  | 668.55  | cpd:C10890 | (+)-Syringaresinol O-beta-D-glucoside                                             |
| KEGG | 389.13 | 443.76  | cpd:C12201 | (+/-)-6-Acetyldihydrosanguinarine                                                 |
| KEGG | 350    | 1721.5  | cpd:C17496 | (10)-Gingerol 8 11-cis-13-trans-eicosatetraenoate                                 |
| KEGG | 284.2  | 1056.19 | cpd:C16505 | (10S)-Juvenile 1,2-dihydronaphthalene                                             |
| KEGG | 220.18 | 1287.67 | cpd:C20325 | (11R)-Dihydro-5'-5'-Hydroxyaverantin                                              |
| KEGG | 320    | 988.49  | cpd:C04742 | (15S)-15-Hydroxy-3-Dihydroxybenzoyl)adenylate                                     |
| KEGG | 451.14 | 673.99  | cpd:C14793 | (1R)-Glutathionyl-(1R)-Fucosterol epoxide                                         |
| KEGG | 388.12 | 219.41  | cpd:C20501 | (1'S6E)-Farnesol                                                                  |
| KEGG | 483.1  | 620.72  | cpd:C04030 | (2,3-Dihydroxybenzoyl)adenylate                                                   |
| KEGG | 428.37 | 1661.75 | cpd:C03910 | (24R4-benzoxazin-3(4H)-one                                                        |
| KEGG | 222    | 245.02  | cpd:C01126 | (2E 2'S)-Oscillo                                                                  |
| KEGG | 280.1  | 118.35  | cpd:C15191 | (2-Isopropyl-1-3S)-2-Hydroxy-2,3-tricarboxylate                                   |
| KEGG | 373.1  | 406.59  | cpd:C15768 | (2R)-2-beta-D-(6Z)-Farnesyl diphosphate                                           |
| KEGG | 600.42 | 1382.43 | cpd:C16274 | (2S 2'S)-Myxol 2'-(4-di-O-methyl-alpha-L-fucoside)                                |
| KEGG | 332.18 | 718.44  | cpd:C04655 | (2S 9E 14Z)-(8xi 11xi 12-Trihydroxyicosa-5                                        |
| KEGG | 382    | 79.96   | cpd:C19760 | (2Z 4 6-trihydroxy-5-4-cyclohexadien-1-one                                        |
| KEGG | 758.5  | 1404.23 | cpd:C15937 | (3R 6-tetrahydronicotinamide-adenine dinucleotide                                 |
| KEGG | 354.2  | 1351.75 | cpd:C04843 | (5Z 7S)-6 7-Epoxyoctadecanoic acid                                                |
| KEGG | 346.1  | 689.96  | cpd:C15591 | (S)-usnate                                                                        |
| KEGG | 683    | 77.28   | cpd:C20482 | (R)-NADH-hydrate                                                                  |
| KEGG | 298.25 | 1242.32 | cpd:C13791 | (6R 13-Epoxyoctad 11-dienoic acid                                                 |
| KEGG | 386.08 | 96.09   | cpd:C15666 | (7R)-7-(4-Carbonyl)-(8R)-Hydroxy-12-dienoic acid                                  |
| KEGG | 310.2  | 1043.27 | cpd:C20704 | Linoleate                                                                         |
| KEGG | 294.22 | 1240.85 | cpd:C04594 | (9Z)-(13S)-12,13-Epoxyoctadeca-9,11-dienoate                                      |
| KEGG | 296.24 | 1204.56 | cpd:C08318 | Laetisarinic acid                                                                 |
| KEGG | 301    | 79.06   | cpd:C02487 | (Ac)2-L-Lys-D-Ala                                                                 |
| KEGG | 255.09 | 95.24   | cpd:C14622 | (E)-1-Methoxy-4-[2-(4-nitrophenyl)ethenyl]benzene                                 |
| KEGG | 434    | 1720.65 | cpd:C05820 | (L-Seryl)adenylate                                                                |
| KEGG | 349.1  | 93.87   | cpd:C11749 | (p-Aminobenzyl)penicillin                                                         |
| KEGG | 85.09  | 107.25  | cpd:C20809 | (R)-2-Methylpyrrolidine                                                           |
| KEGG | 217.1  | 105.7   | cpd:C21289 | (R)-3-(indol-3-yl)-2-oxobutyrate                                                  |
| KEGG | 402.09 | 93.62   | cpd:C04352 | (R)-4'-Phosphopantothienoyl-L-cysteine                                            |
| KEGG | 88.1   | 108.78  | cpd:C00810 | (R)-Acetoin                                                                       |
| KEGG | 339.1  | 88.57   | cpd:C11818 | (R)-Canadine 3-Epoxy-squalene                                                     |
| KEGG | 266.13 | 110.76  | cpd:C14546 | (R)-Indenestrol 5-dihydrofuran-2-acetate                                          |
| KEGG | 90     | 1790.53 | cpd:C00256 | (R)-Lactate                                                                       |
| KEGG | 426.39 | 1509.05 | cpd:C01054 | (R)-Pan-3beta                                                                     |
| KEGG | 142.03 | 5.32    | cpd:C14610 | (S)-5-Oxo-2,4-Methylenedioxyphenyl)-2-(mercaptomethyl)-1-oxopropyl]glycine        |
| KEGG | 158.03 | 78.86   | cpd:C00337 | (S)-Dihydroorotate                                                                |
| KEGG | 486    | 1743.92 | cpd:C01315 | (S)-4-Methylenedioxyphenyl)-2-(acetylthio)methyl-1-oxopropyl]glycine benzyl ester |
| KEGG | 354.1  | 208.98  | cpd:C01313 | (S)-N-[3-(3                                                                       |
| KEGG | 235.14 | 88.8    | cpd:C05204 | (S)-Tetrahydroprotoberberine                                                      |
| KEGG | 308.1  | 106.84  | cpd:C20129 | (S)-Warfarin                                                                      |
| KEGG | 207.03 | 106.24  | cpd:C21068 | [5-(Aminomethyl)furan-3-yl]methyl phosphate                                       |
| KEGG | 294.18 | 1136.59 | cpd:C10462 | [6]-Gingerol 4 5 6-tetramethoxyphenyl)-2-propen-1-one                             |
| KEGG | 276.2  | 1155.79 | cpd:C10494 | [6]-Shogaol                                                                       |
| KEGG | 146.05 | 1788.41 | cpd:C14473 | 1(2H)-Phthalazinone                                                               |

|      |        |         |            |                                                                                          |
|------|--------|---------|------------|------------------------------------------------------------------------------------------|
| KEGG | 464    | 74.15   | cpd:C14895 | 1-(2-Hydroxy-3                                                                           |
| KEGG | 338.07 | 91.52   | cpd:C04905 | 1-(4-Amino-2-methylpyrimid-5-ylmethyl)-2-methylpyridinium bromide                        |
| KEGG | 454.1  | 85.81   | cpd:C04823 | 1-(5'-Phosphoribosyl)-5-amino-4-(N-succinocarboxamide)-imidazole                         |
| KEGG | 366.1  | 88.87   | cpd:C04734 | 1-(5'-Phosphoribosyl)-7-dihydroxy-4-hydroxy-2-dioxocyclopenta[c][1]benzopyran-6-propanal |
| KEGG | 338.05 | 625.45  | cpd:C04437 | 1-(5-Phosphoribosyl)-2-Trihydroxybenzene                                                 |
| KEGG | 255.1  | 106.5   | cpd:C04229 | 1-(Indol-3-yl)pyrrolidine-2-Bis(4-nitrophenyl)ethane                                     |
| KEGG | 348.08 | 117.28  | cpd:C19591 | 4-Tetrahydro-2-Bis(chloromethoxy)ethane                                                  |
| KEGG | 126.03 | 4.58    | cpd:C01108 | 1,2-Di-(9Z,15Z-octadecatrienoyl)-3-O-beta-D-galactosyl-sn-glycerol                       |
| KEGG | 272.08 | 85.67   | cpd:C14589 | 1,6-Dimethoxypyrene                                                                      |
| KEGG | 157.99 | 78.76   | cpd:C19348 | 1,8-Diazacyclotetradecane-9-dione                                                        |
| KEGG | 774.53 | 1480.32 | cpd:C13871 | 1,3-Di-O-galactosyl-sn-glycerol                                                          |
| KEGG | 262    | 131.12  | cpd:C18260 | 1,11-Epoxy-3-geranylgeranylindole                                                        |
| KEGG | 226.17 | 9.07    | cpd:C04277 | 1,16-Dihydroxyhexadecanoic acid                                                          |
| KEGG | 268.07 | 96.06   | cpd:C15110 | 1-[6-Hydroxy-2-(4-hydroxyphenyl)-1-benzofuran-3-yl]ethanone                              |
| KEGG | 405.3  | 978.14  | cpd:C20526 | 10 Cytidine diphosphate                                                                  |
| KEGG | 288.23 | 937.8   | cpd:C08285 | 10 D-Mannitol                                                                            |
| KEGG | 566.22 | 656.05  | cpd:C12405 | 100-1 polyketide products                                                                |
| KEGG | 468.1  | 670.76  | cpd:C12403 | 104-1                                                                                    |
| KEGG | 294.17 | 968.99  | cpd:C11635 | 10-Deoxysarpagine                                                                        |
| KEGG | 392.1  | 112.64  | cpd:C09447 | 10-epi-Eupatorin-4-dien-3-one acetate                                                    |
| KEGG | 473    | 1732.62 | cpd:C00234 | 10-Formyltetrahydrofolate                                                                |
| KEGG | 364.1  | 84.5    | cpd:C17939 | 10-Hydroxycanthal-17beta-Dihydroxy-4-dien-3-one                                          |
| KEGG | 314.19 | 1179.33 | cpd:C14999 | 10-Hydroxyestrone-20-dione                                                               |
| KEGG | 422.14 | 1007.04 | cpd:C11660 | 10-Hydroxymorroniside                                                                    |
| KEGG | 316.2  | 1066.51 | cpd:C14887 | 11alpha                                                                                  |
| KEGG | 344.24 | 992.98  | cpd:C14964 | 11alpha-Hydroxy-12alpha-methyl-pregn-4-ene-3                                             |
| KEGG | 338.23 | 1383.29 | cpd:C15338 | 17beta-Dihydroxy-9alpha-fluoro-17alpha-methyl-5alpha-androstan-3-one                     |
| KEGG | 368.22 | 1014.55 | cpd:C05964 | 11-Dehydro-thromboxane B2                                                                |
| KEGG | 322.08 | 99.18   | cpd:C18682 | 11-Deoxylandomycinone                                                                    |
| KEGG | 556.22 | 769.08  | cpd:C11666 | 11-Hydroxyiridodial glucoside pentaacetate                                               |
| KEGG | 480.09 | 618.1   | cpd:C17520 | 11-o-Galloyl-beta-estrone-20-dione                                                       |
| KEGG | 440.37 | 1585.68 | cpd:C19943 | 11-Oxo-beta-estrone-6-dienoate                                                           |
| KEGG | 410.14 | 133.85  | cpd:C10464 | 12a-Hydroxyrotenone                                                                      |
| KEGG | 408.13 | 160.55  | cpd:C14669 | 12alpha-Bromo-11beta-hydroxypregn-4-ene-3                                                |
| KEGG | 386.2  | 369.86  | cpd:C15569 | 12alpha-Hydroxy-3-oxocholane-4                                                           |
| KEGG | 532.2  | 778.46  | cpd:C08767 | 12alpha-Hydroxyamorphostatin                                                             |
| KEGG | 242.2  | 1176.7  | cpd:C16665 | 12-Methyltetradecanoic acid                                                              |
| KEGG | 660.42 | 1297.07 | cpd:C09153 | 12-O-Palmitoyl-16-hydroxyphorbol 13-acetate                                              |
| KEGG | 212.14 | 1129.6  | cpd:C16311 | 12-Oxo-9(Z)-dodecenoic acid                                                              |
| KEGG | 614.24 | 677.84  | cpd:C11829 | 13(1)-Hydroxy-magnesium-protoporphyrin IX 13-monomethyl ester                            |
| KEGG | 346.23 | 1155.06 | cpd:C04170 | 13-(2-Methylcrotonoyl)oxylupanine                                                        |
| KEGG | 258.2  | 1397.19 | cpd:C20696 | 13-Apo-beta-estrone-20-dione 7-acetate                                                   |
| KEGG | 518.38 | 1116.25 | cpd:C04103 | 13-beta-D-Glucosyloxydocosanoate                                                         |
| KEGG | 412.37 | 1503.32 | cpd:C05108 | 14-Demethyllanosterol                                                                    |
| KEGG | 404    | 1744.34 | cpd:C14922 | 15beta-Hydroxy-17beta-Dihydroxyandrost-4-en-3-one dipropionate                           |
| KEGG | 555    | 1733    | cpd:C20689 | 15-Demethylaclacinomycin T                                                               |
| KEGG | 598.24 | 1493.71 | cpd:C20667 | 15-Oxo-beta-bilirubin                                                                    |
| KEGG | 416.3  | 1457.82 | cpd:C15289 | 16alpha                                                                                  |
| KEGG | 306.2  | 1041.64 | cpd:C15074 | 16alpha-Fluoro-17alpha-hydroxyandrost-4-en-3-one                                         |
| KEGG | 322.17 | 980.97  | cpd:C15004 | 16beta-Chloro-17beta-hydroxyandrost-4-en-3-one                                           |

|      |        |         |            |                                                                                  |
|------|--------|---------|------------|----------------------------------------------------------------------------------|
| KEGG | 366.19 | 234.52  | cpd:C11675 | 16-Methoxytabersonine                                                            |
| KEGG | 340.25 | 1442.74 | cpd:C14998 | 17beta-(1H-Imidazol-4-yl)androst-5-en-3beta-ol                                   |
| KEGG | 270.16 | 1115.57 | cpd:C14485 | 17beta-Dihydroequilin                                                            |
| KEGG | 448.21 | 990.69  | cpd:C11237 | 17beta-Estradiol 17-(beta-D-glucuronide)                                         |
| KEGG | 528.17 | 770.89  | cpd:C11289 | 17beta-Estradiol 17-dimethyl-5alpha-androstan-3-one                              |
| KEGG | 334.25 | 1177.07 | cpd:C15137 | 17beta-Hydroxy-2alpha-(hydroxymethyl)-17-methyl-5alpha-androstan-3-one           |
| KEGG | 348.27 | 1440.49 | cpd:C14919 | 17beta-Hydroxy-2alpha-(methoxymethyl)-17-methyl-5alpha-androstan-3-one           |
| KEGG | 318.3  | 1103.93 | cpd:C15099 | 17beta-Hydroxy-4-dieno[2,3-d]isoxazol-17beta-ol                                  |
| KEGG | 376.2  | 802.87  | cpd:C14973 | 17beta-Hydroxy-7alpha-mercaptoandrost-4-en-3-one 7-propionate                    |
| KEGG | 274.19 | 1058.04 | cpd:C15257 | 17beta-Hydroxyestr-5(10)-en-3-one                                                |
| KEGG | 327.2  | 1115.8  | cpd:C15177 | 17-Methylandrosta-2                                                              |
| KEGG | 368.21 | 994.02  | cpd:C15985 | 17-O-Acetylajmaline                                                              |
| KEGG | 316.28 | 1066.54 | cpd:C14933 | 17-Propyl-5alpha-androst-2-en-17beta-ol                                          |
| KEGG | 334.1  | 750.88  | cpd:C12400 | 19-Hydroxy-8-O-methyltetragulol                                                  |
| KEGG | 272.18 | 1164.63 | cpd:C14500 | 19-Norandrostenedione                                                            |
| KEGG | 259.05 | 89.97   | cpd:C01283 | 1-Amino-1-deoxy-scylo-inositol 4-phosphate                                       |
| KEGG | 101.05 | 109.32  | cpd:C01234 | 1-Aminocyclopropane-1-carboxylate                                                |
| KEGG | 111.01 | 1786.62 | cpd:C11033 | 1-Aminomethylphosphonic acid                                                     |
| KEGG | 342.1  | 93.95   | cpd:C10433 | 1-Caffeoyl-beta-D-glucose                                                        |
| KEGG | 332.1  | 112.22  | cpd:C15387 | 1-Dehydro-9-fluoro-11-oxotestolactone                                            |
| KEGG | 162.08 | 143.58  | cpd:C13840 | 1-Ethyl-2-benzimidazolinone                                                      |
| KEGG | 836.54 | 1476.8  | cpd:C13888 | 1-Hexadecanoyl-2-(9Z-octadecenoyl)-sn-glycero-3-phospho-1'-myo-inositol          |
| KEGG | 744.59 | 1719.31 | cpd:C13876 | 1-Hexadecanoyl-2-dideoxy-sn-glycero-3-phosphocholine                             |
| KEGG | 828.5  | 1740.03 | cpd:C13885 | 1-Hexadecanoyl-2-(9Z-octadecenoyl)-sn-glycero-3-phospho-sn-glycerol 3'-phosphate |
| KEGG | 754.5  | 1515.59 | cpd:C13890 | 1-Hexadecanoyl-2-(9Z-octadecenoyl)-sn-glycero-3-pyrophosphate                    |
| KEGG | 735.58 | 1387.15 | cpd:C04873 | 1-Hexadecylthio-2-hexadecanoylamino-1                                            |
| KEGG | 552.43 | 1590.17 | cpd:C15860 | 1'-Hydroxytorulene                                                               |
| KEGG | 384.1  | 92.84   | cpd:C20503 | 1'-Hydroxyversicolorone                                                          |
| KEGG | 139    | 103.96  | cpd:C16697 | 1-Indolizidinone                                                                 |
| KEGG | 410.2  | 201.01  | cpd:C10071 | 1-Isomangostir 4-tetrahydro-6-methoxy-2-naphthyl)-2(1H)-pyridone                 |
| KEGG | 520.34 | 1205.06 | cpd:C04100 | 1-Linoleoylglycerophosphocholine                                                 |
| KEGG | 232.1  | 952.74  | cpd:C18259 | 1-Methoxypyrene                                                                  |
| KEGG | 269    | 1723.94 | cpd:C14896 | 1-Methyl-6-(1                                                                    |
| KEGG | 137.07 | 106.58  | cpd:C02918 | 1-Methylnicotinamide                                                             |
| KEGG | 84.1   | 1669.42 | cpd:C06178 | 1-Methylpyrrolinium                                                              |
| KEGG | 182.04 | 84.15   | cpd:C16359 | 1-Methyluric acid                                                                |
| KEGG | 463    | 72.81   | cpd:C19761 | 1-O-(2-Acetamido-2-deoxy-alpha-D-glucopyranosyl)-1D-myo-inositol 3-phosphate     |
| KEGG | 356.1  | 265.02  | cpd:C17759 | 1-O-Feruloyl-beta-D-glucose                                                      |
| KEGG | 496.3  | 1176.91 | cpd:C04102 | 1-Palmitoylglycerophosphocholine                                                 |
| KEGG | 274.01 | 88.29   | cpd:C04037 | 1-Phospho-alpha-D-galacturonate                                                  |
| KEGG | 145.05 | 160.68  | cpd:C06415 | 2(1H)-Quinolinone                                                                |
| KEGG | 316.1  | 126.23  | cpd:C14893 | 2-(4-Chlorophenyl)-3-phenyl-3-(2-pyridinyl)acrylonitrile                         |
| KEGG | 334.07 | 1092.8  | cpd:C04641 | 2-(alpha-D-Galactosyl)-sn-glycerol 3-phosphate                                   |
| KEGG | 469.1  | 665.32  | cpd:C05125 | 2-(alpha-Hydroxyethyl)thiamine diphosphate,2,3,6'-Heptabromodiphenyl ether       |
| KEGG | 391.1  | 112.51  | cpd:C21374 | 2-(Glutathionyl)-2-Bis(4-hydroxyphenyl)hexafluoropropane                         |
| KEGG | 155.99 | 90.72   | cpd:C03920 | 2-(Methylthio)ethanesulfonate                                                    |
| KEGG | 715.4  | 1196.12 | cpd:C18139 | 2,3,4,6'-Peptahydroxychalcone 4'-O-glucoside                                     |
| KEGG | 336.1  | 1130.82 | cpd:C14350 | 2,3,4-Trichlorobiphenyl                                                          |
| KEGG | 380    | 72.49   | cpd:C15050 | 2-Dimethyl-3-[4-(acetyloxy)phenyl]-4-ethyl-2f 10-Tetrahydroxyberberine           |
| KEGG | 450.1  | 366.38  | cpd:C16408 | 2',3'-Cyclic UMP                                                                 |

|      |        |         |            |                |                                                                            |
|------|--------|---------|------------|----------------|----------------------------------------------------------------------------|
| KEGG | 255.96 | 80.05   | cpd:C14357 | 2              | 3-Dimethylmaleate                                                          |
| KEGG | 296.1  | 105.61  | cpd:C12331 | 2              | 4-Hexadienal                                                               |
| KEGG | 306.03 | 1738.5  | cpd:C02355 | 2'             | 5-Diamino-6-(5-phospho-D-ribosylamino)pyrimidin-4(3H)-one                  |
| KEGG | 144.04 | 3.76    | cpd:C00922 | 2              | 7 4'-Trihydroxyisoflavanone                                                |
| KEGG | 96.1   | 1667.09 | cpd:C19249 | 2              | 21-Diprenylterpendole J                                                    |
| KEGG | 353.1  | 84.75   | cpd:C01304 | 2,5            | -Diamino-6-(5-phospho-D-ribosylamino)pyrimidin-4(3H)-one                   |
| KEGG | 272.07 | 679.55  | cpd:C15567 | 2,7,4'         | -Trihydroxyisoflavanone; 2,4',7-Trihydroxyisoflavanone                     |
| KEGG | 657.4  | 1353.99 | cpd:C20594 | 20,21          | -Diprenylterpendole                                                        |
| KEGG | 480.3  | 1239.87 | cpd:C02633 | 20             | -Hydroxycedysone                                                           |
| KEGG | 455.2  | 603.04  | cpd:C03577 | 20             | -Hydroxyleul 3alpha-(Difluoromethylene)-5alpha-androstan-17beta-ol acetate |
| KEGG | 491.2  | 627.47  | cpd:C20135 | 20-O-Methyl-1' | 11 20-trione                                                               |
| KEGG | 581.36 | 1267.61 | cpd:C20760 | 20-Oxo-5-O-be  | 5-dihydroxy-6-oxo-7-(phosphoxy)heptanoate                                  |
| KEGG | 366.24 | 1440.76 | cpd:C15322 | 2              | alpha                                                                      |
| KEGG | 342.22 | 1146.25 | cpd:C15301 | 2              | alpha-Methylpregn-4-ene-3                                                  |
| KEGG | 287.04 | 810.29  | cpd:C20644 | 2              | -Amino-4                                                                   |
| KEGG | 225.13 | 990.87  | cpd:C20698 | 2              | -Aminoethyl diphenylborinate                                               |
| KEGG | 125.02 | 76.82   | cpd:C03557 | 2              | -Aminoethylphosphonate                                                     |
| KEGG | 173.07 | 95.57   | cpd:C21248 | 2              | -Aminovalienone                                                            |
| KEGG | 175.09 | 91.51   | cpd:C10898 | 2              | -Benzimidazolylguanidine                                                   |
| KEGG | 171.95 | 1787.62 | cpd:C14841 | 2              | -Bromopheno 6-dideoxy-6-sulfo-D-gluconate                                  |
| KEGG | 276.02 | 91.03   | cpd:C04234 | 2              | -Carboxy-D-arabinitol 1-phosphate                                          |
| KEGG | 187.99 | 1720.47 | cpd:C18304 | 2              | -Chloro-5-methyl-cis-dienelactone                                          |
| KEGG | 242.01 | 108.79  | cpd:C21180 | 2              | -Dehydro-3                                                                 |
| KEGG | 482.22 | 776.55  | cpd:C20509 | 2'             | -Dehydrokanamycin A                                                        |
| KEGG | 146.06 | 84.9    | cpd:C00966 | 2              | -Dehydropantoate                                                           |
| KEGG | 272.03 | 103.61  | cpd:C17692 | 2-epi-5-epi    | -Valiolone 7-phosphate                                                     |
| KEGG | 278.15 | 1270.57 | cpd:C03343 | 2              | -Ethylhexyl pt 4-benzoquinone                                              |
| KEGG | 111.05 | 87.12   | cpd:C11010 | 2              | -Fluoroaniline 4-pentadienoate                                             |
| KEGG | 259.2  | 1396.96 | cpd:C11848 | 2              | -Heptyl-3-hydroxy-quinolone                                                |
| KEGG | 124.02 | 77.37   | cpd:C07103 | 2              | -Hydroxy-1                                                                 |
| KEGG | 114.03 | 56.28   | cpd:C00596 | 2              | -Hydroxy-2,4-pentadienoate                                                 |
| KEGG | 157.07 | 104.42  | cpd:C17361 | 2              | -Hydroxyethylclavam                                                        |
| KEGG | 148.04 | 89.33   | cpd:C02630 | 2              | -Hydroxyglutarate                                                          |
| KEGG | 468.4  | 1510.39 | cpd:C02793 | 2              | -Hydroxy-vita 6-N-Bis(2 3-dihydroxybenzoyl)-L-lysine                       |
| KEGG | 236.04 | 105.06  | cpd:C19688 | 2              | -Imino-3-(7-chloroindol-3-yl)propanoate                                    |
| KEGG | 286.06 | 134.17  | cpd:C15439 | 2              | -Methacryloyloxyethyl phenyl phosphate                                     |
| KEGG | 418.1  | 138.27  | cpd:C06446 | 2              | -N,6-N-Bis(2,3-dihydroxybenzoyl)-L-lysine                                  |
| KEGG | 582.3  | 1377.82 | cpd:C06512 | 2'             | -Norberbamunine                                                            |
| KEGG | 372.07 | 1002.59 | cpd:C03062 | 2              | -O-Caffeoylglucarate                                                       |
| KEGG | 162.04 | 1780.34 | cpd:C17211 | 2              | -Oxo-5-methylthiopentanoic acid                                            |
| KEGG | 190.07 | 109.39  | cpd:C17220 | 2              | -Oxo-7-methylthioheptanoic acid                                            |
| KEGG | 204.08 | 160.41  | cpd:C17224 | 2              | -Oxo-8-methylthiooctanoic acid                                             |
| KEGG | 188.07 | 161.29  | cpd:C16589 | 2              | -Oxosuberate                                                               |
| KEGG | 212.01 | 110.32  | cpd:C17947 | 2              | -Phosphinomethylmalate                                                     |
| KEGG | 229.2  | 1404.72 | cpd:C13795 | 2S             | -Amino-tridecanoic acid                                                    |
| KEGG | 365.1  | 84.41   | cpd:C14862 | 2              | -S-Glutathionyl 4-Cyclopentadien-1-ylidene)pregn-4-en-20-one               |
| KEGG | 422.07 | 95.1    | cpd:C20985 | 2              | -Sulfotrehalos 4-Dihydropyridin-1-yl)-L-alanine                            |
| KEGG | 614.4  | 1343.88 | cpd:C11321 | 3              | -((3-Cholamidopropyl)dimethylammonium)-1-propanesulfonate                  |
| KEGG | 362.3  | 1349.23 | cpd:C14968 | 3              | -(2 5-diene-11 17-dione                                                    |
| KEGG | 199.07 | 113.88  | cpd:C04446 | 3              | -(3,4-Dihydropyridin-1-yl)-L-alanine                                       |

|      |        |         |            |                                                                    |                                                             |
|------|--------|---------|------------|--------------------------------------------------------------------|-------------------------------------------------------------|
| KEGG | 180.04 | 113.97  | cpd:C01179 | 3-(4-Hydroxypl 17beta-Diacet                                       | 3 5(10)-trien-6-one                                         |
| KEGG | 374.2  | 1383.31 | cpd:C14992 | 3-(Acetyloxy)-9 3'-Dimethylbenzidine                               |                                                             |
| KEGG | 444.3  | 1322.79 | cpd:C04590 | 3-(O-Geranylge                                                     | 4 6-Trichlorocatechol                                       |
| KEGG | 370.2  | 724.25  | cpd:C15313 |                                                                    | 3 4-Dihydroanhydrorhodovibrin                               |
| KEGG | 212.13 | 967.99  | cpd:C14443 |                                                                    | 3 4-Dihydroxy-2- 6E)-farnesyl]-3 4-dihydroquinoline 1-oxide |
| KEGG | 211.92 | 1790.49 | cpd:C12831 |                                                                    | 3 4-Dihydroxy-L-phenylalanine                               |
| KEGG | 568    | 1743.76 | cpd:C15886 |                                                                    | 3 5 3'-Triiodothyropyruvate                                 |
| KEGG | 397    | 976.02  | cpd:C21142 |                                                                    | 3 5 7 9 13-Pentadecen-2-one                                 |
| KEGG | 197    | 1794.91 | cpd:C00355 |                                                                    | 3 5-Dihydroxy-1 4-naphthoquinone                            |
| KEGG | 650    | 1743.87 | cpd:C03832 |                                                                    | 3 5-Diiodo-L-tyrosine                                       |
| KEGG | 214.14 | 924.75  | cpd:C21360 |                                                                    | 3 5-Dinitro-L-tyrosine                                      |
| KEGG | 190.03 | 93.61   | cpd:C04110 |                                                                    | 3 d]pyran-6-one                                             |
| KEGG | 433    | 1720.3  | cpd:C01060 |                                                                    | 4 d]pyran-6-one-tyrosine                                    |
| KEGG | 271.04 | 152.61  | cpd:C03225 |                                                                    | 3 12alpha-Dihydroxy-5beta-chol-6-enoate                     |
| KEGG | 333.1  | 116.34  | cpd:C14951 | 3-[(2-Chlorobe                                                     | 7alpha 12alpha-Trihydroxy-5beta-cholestane                  |
| KEGG | 456.36 | 1391.51 | cpd:C20510 | 30-Hydroxy-11-oxo-beta-amyrin                                      |                                                             |
| KEGG | 390.28 | 1606.38 | cpd:C11637 | 3alpha                                                             |                                                             |
| KEGG | 420.36 | 1515.76 | cpd:C05454 | 3alpha,7alpha,12alpha-Trihydroxy-5beta-cholestane                  |                                                             |
| KEGG | 470.34 | 1060.92 | cpd:C03930 | 3alpha-Hydroxyglycyrretinate                                       |                                                             |
| KEGG | 308.19 | 1013.07 | cpd:C15396 | 3beta-Chloro-5 2-dihydroxycyc 5-diene                              |                                                             |
| KEGG | 444.36 | 1369.69 | cpd:C04840 | 3beta-Hydroxy-4beta-methyl-5alpha-cholest-7-ene-4alpha-carboxylate |                                                             |
| KEGG | 258.05 | 118.46  | cpd:C19357 | 3-Carbethoxypsoralen                                               |                                                             |
| KEGG | 146.01 | 94      | cpd:C12837 | 3-Chloro-cis-1                                                     |                                                             |
| KEGG | 247.04 | 86.4    | cpd:C11290 | 3-Chlorosalicylanilide                                             |                                                             |
| KEGG | 484.2  | 844.05  | cpd:C21254 | 3''-Deamino-3''-hydroxykanamycin B                                 |                                                             |
| KEGG | 446.34 | 1506.64 | cpd:C15792 | 3-Dehydroteasterone                                                |                                                             |
| KEGG | 256.18 | 1055.44 | cpd:C14239 | 3-Deoxyestradi                                                     | 7 8-trimethoxy-2-naphthoate                                 |
| KEGG | 186    | 89.52   | cpd:C02514 | 3-Fumarylpyruvate                                                  |                                                             |
| KEGG | 100    | 94.9    | cpd:C08492 | 3-Hexenol                                                          |                                                             |
| KEGG | 278.08 | 87.9    | cpd:C21322 | 3-Hydroxy-6 N6                                                     | N6-trimethyl-L-lysine                                       |
| KEGG | 566.41 | 1594.3  | cpd:C15965 | 3'-Hydroxyechinenone                                               |                                                             |
| KEGG | 526.12 | 118.66  | cpd:C11462 | 3-Hydroxy-L-ty                                                     | 3 5(10) 16-tetraene                                         |
| KEGG | 205.16 | 1287.18 | cpd:C01259 | 3-Hydroxy-N6                                                       | 3 5(10)-triene-16 17-dione 16-oxime                         |
| KEGG | 297.27 | 1082.05 | cpd:C06121 | 3-Ketosphingosine                                                  |                                                             |
| KEGG | 268.2  | 1242.63 | cpd:C15107 | 3-Methoxyestra-1                                                   |                                                             |
| KEGG | 313.17 | 1278.18 | cpd:C15078 | 3-Methoxyestra-1                                                   |                                                             |
| KEGG | 360.13 | 152.86  | cpd:C17754 | 3-Methoxytyramine-betaxanthin                                      |                                                             |
| KEGG | 84.06  | 110.49  | cpd:C07330 | 3-Methyl-2-butenal                                                 |                                                             |
| KEGG | 118.02 | 108.27  | cpd:C11119 | 3-Nitrosothiazolidine                                              |                                                             |
| KEGG | 546.34 | 1018.33 | cpd:C06630 | 3-O-alpha-Mycarosylerythronolide B                                 |                                                             |
| KEGG | 214.16 | 933.77  | cpd:C02367 | 3-Oxododecanoic acid                                               |                                                             |
| KEGG | 153.01 | 108.79  | cpd:C00606 | 3-Sulfino-L-alar 21-Dehydrocorynantheine aldehyde                  |                                                             |
| KEGG | 136.05 | 100.96  | cpd:C07085 | 3-Vinylcatecho 4'-Diapolycopenedial                                |                                                             |
| KEGG | 372.03 | 73.54   | cpd:C13677 | 4-(N-Maleimid                                                      | 4'-Diapophytoene                                            |
| KEGG | 351    | 1720.77 | cpd:C11679 |                                                                    | 4 4'-Diapophytofluene                                       |
| KEGG | 428.27 | 1094.42 | cpd:C19798 |                                                                    | 4 4'-Dihydroxy-3 5-dimethoxydihydrostilbene                 |
| KEGG | 408.38 | 1337    | cpd:C16144 |                                                                    | 4 4'-Methylene bis(2-methylaniline)                         |
| KEGG | 406.36 | 1643.89 | cpd:C19840 |                                                                    | 4 4'-Stilbenedicarboxamidine dihydrochloride                |
| KEGG | 274.12 | 822.49  | cpd:C10256 |                                                                    | 4 5-Chrysenedicarboxylate                                   |
| KEGG | 226.15 | 350.17  | cpd:C19260 | 4,4'-Methylene bis(2-methylaniline)                                |                                                             |



|      |        |         |            |                                                                 |
|------|--------|---------|------------|-----------------------------------------------------------------|
| KEGG | 336.09 | 84.79   | cpd:C15389 | 4,4'-Stilbenedicarboximidine dihydrochloride                    |
| KEGG | 316.07 | 178.49  | cpd:C18277 | 4,5-Chrysenedicarboxylate                                       |
| KEGG | 219.04 | 87.34   | cpd:C04556 | 4-Amino-2-methyl-5-(phosphooxymethyl)pyrimidine                 |
| KEGG | 138.09 | 108.05  | cpd:C20267 | 4-Amino-5-ami 4' 5' 6'-tetramethoxychalcone                     |
| KEGG | 103.1  | 86.99   | cpd:C00334 | 4-Aminobutanoate                                                |
| KEGG | 87.07  | 62.32   | cpd:C00555 | 4-Aminobutyra 5-cyclohexadie 2-dione                            |
| KEGG | 450.17 | 682.06  | cpd:C15080 | 4-Benzyloxy-2'-hydroxy-3'                                       |
| KEGG | 430.38 | 1668.38 | cpd:C04814 | 4beta-Hydroxymethyl-4alpha-methyl-5alpha-cholest-7-en-3beta-ol  |
| KEGG | 185.93 | 1720.4  | cpd:C14846 | 4-Bromo-3                                                       |
| KEGG | 188.04 | 1783.28 | cpd:C06584 | 4-Chlorobiphenyl                                                |
| KEGG | 126.02 | 109.13  | cpd:C14451 | 4-Chlorotoluene                                                 |
| KEGG | 108.1  | 1663.58 | cpd:C01468 | 4-Cresol                                                        |
| KEGG | 208.15 | 845.31  | cpd:C14236 | 4-Heptyloxyphenol                                               |
| KEGG | 381.08 | 84.67   | cpd:C06628 | 4-Hydroxy-6-methylpretetramide                                  |
| KEGG | 120.06 | 108.09  | cpd:C05627 | 4-Hydroxystyrene                                                |
| KEGG | 598.4  | 1123.32 | cpd:C15928 | 4-Ketomyxol                                                     |
| KEGG | 478.1  | 593.16  | cpd:C08423 | 4-Methoxyglucobrassicin                                         |
| KEGG | 314.08 | 223.06  | cpd:C17784 | 4'-Methylcapillarisin                                           |
| KEGG | 148.02 | 1274.21 | cpd:C01180 | 4-Methylthio-2 2'-bithiophene                                   |
| KEGG | 352.08 | 88.14   | cpd:C11584 | 4-Methylumbe 10-Methenyltetrahydrofolate                        |
| KEGG | 183.05 | 77.62   | cpd:C00847 | 4-Pyridoxate 11a-Dehydrotetracycline                            |
| KEGG | 216.01 | 91.52   | cpd:C08397 | 5-(3-Buten-1-ynyl)-2                                            |
| KEGG | 456.2  | 701.59  | cpd:C00445 | 5,10-Methenyltetrahydrofolate                                   |
| KEGG | 442.1  | 654.98  | cpd:C03206 | 5a,11a-Dehydrotetracycline                                      |
| KEGG | 285.02 | 78.93   | cpd:C05155 | 5-Amino-4-chloro-2-(5-hydroxymuconoyl)-3(2H)-pyridazinone       |
| KEGG | 127.04 | 90.4    | cpd:C05516 | 5-Amino-4-imidazole carboxylate                                 |
| KEGG | 83.05  | 97.49   | cpd:C05239 | 5-Aminoimidazole                                                |
| KEGG | 418.09 | 746.57  | cpd:C06435 | 5'-Butyrylphosphoinosine                                        |
| KEGG | 394.08 | 93.31   | cpd:C06436 | 5'-Butyrylphosphouridine                                        |
| KEGG | 216.03 | 85.79   | cpd:C04052 | 5-Carboxy-2-oxohept-3-enedioate                                 |
| KEGG | 245.08 | 109.23  | cpd:C16635 | 5'-Deoxy-5-fluorocytidine                                       |
| KEGG | 138.02 | 112.94  | cpd:C14480 | 5-Diazouracil                                                   |
| KEGG | 472.18 | 616.16  | cpd:C00664 | 5-Formiminotetrahydrofolate                                     |
| KEGG | 219.1  | 120.92  | cpd:C05646 | 5-Hydroxyindolepyruvate                                         |
| KEGG | 220.1  | 118.34  | cpd:C00643 | 5-Hydroxy-L-tryptophan                                          |
| KEGG | 252.07 | 664.1   | cpd:C05648 | 5-Hydroxy-N-formylkynurenine                                    |
| KEGG | 232.04 | 86.98   | cpd:C02951 | 5-Hydroxyxanthotoxin                                            |
| KEGG | 205.1  | 92.2    | cpd:C05660 | 5-Methoxyindoleacetate                                          |
| KEGG | 142.04 | 85.53   | cpd:C05281 | 5-Methylbarbiturate                                             |
| KEGG | 297.09 | 200.33  | cpd:C00170 | 5'-Methylthioadenosine                                          |
| KEGG | 180.05 | 123.38  | cpd:C03089 | 5-Methylthio-D-ribose                                           |
| KEGG | 331.13 | 106.6   | cpd:C03996 | 5'-O-beta-D-Gl 8a-Seco-6 8a-deoxy-5-oxoavermectin "2b" aglycone |
| KEGG | 308.2  | 1023.42 | cpd:C10373 | 5-O-Methyleml 8-Di-DMA-chrysin                                  |
| KEGG | 314.05 | 101.42  | cpd:C04376 | 5'-Phosphoribosyl-N-formylglycinamide                           |
| KEGG | 572.3  | 918.76  | cpd:C11953 | 6 5-diaminopyrazine-3-carboxamide                               |
| KEGG | 390.18 | 787.75  | cpd:C11573 | 6,8-Di-DMA-chrysin                                              |
| KEGG | 466    | 78.67   | cpd:C15803 | 6alpha-Hydrox 3-dimethylben. 4-diol                             |
| KEGG | 257.08 | 115.57  | cpd:C13753 | 6-Chloro-3                                                      |
| KEGG | 260.02 | 94.12   | cpd:C21182 | 6-Deoxy-6-sulfo-D-gluconate                                     |
| KEGG | 410.32 | 1515.53 | cpd:C20738 | 6-Geranylgeranyl-2                                              |

|               |        |         |            |                                               |
|---------------|--------|---------|------------|-----------------------------------------------|
| KEGG          | 303.05 | 731.75  | cpd:C08646 | 6-Hydroxycyan 12-Dimethylbenz[a]anthracene    |
| KEGG          | 393.1  | 104.8   | cpd:C16620 | 6-Methylthiogl 8-Dihydroxykynurenate          |
| KEGG          | 494.26 | 627.3   | cpd:C21268 | 6'-Oxo-G418                                   |
| KEGG          | 256.13 | 264.24  | cpd:C19488 | 7,12-Dimethylbenz[a]anthracene                |
| KEGG          | 221.03 | 88.53   | cpd:C01111 | 7,8-Dihydroxykynurenate                       |
| KEGG          | 335.11 | 106.27  | cpd:C21163 | 7-Demethylmitomycin A                         |
| KEGG          | 360.14 | 153.59  | cpd:C11636 | 7-Deoxyloganate                               |
| KEGG          | 165.07 | 116.63  | cpd:C02242 | 7-Methylguanil 8a-Deoxyoleandolide            |
| KEGG          | 378.08 | 87.35   | cpd:C03998 | 7-Methylguanosine 5'-phosphate                |
| KEGG          | 371.2  | 723.17  | cpd:C05322 | 7-O-Acetylsalutaridinol                       |
| KEGG          | 372.25 | 1189.61 | cpd:C11989 | 8,8a-Deoxyoleandolide                         |
| KEGG          | 299.06 | 109.93  | cpd:C11326 | 8-Anilino-1-naphthalene sulfonic acid         |
| KEGG          | 418.32 | 1024.55 | cpd:C06733 | 8'-apo-beta-Ca 11-dione                       |
| KEGG          | 498.2  | 668.7   | cpd:C11658 | 8-Epiiridodial glucoside tetraacetate         |
| KEGG          | 318.1  | 651.96  | cpd:C12398 | 8-O-Methyltetrangulol                         |
| KEGG          | 394.11 | 923.15  | cpd:C15371 | 9-Bromo-17beta-hydroxy-17-methylandro-4-ene-3 |
| KEGG          | 376.28 | 1638.61 | cpd:C20692 | 9-cis-10'-Apo-beta-carotenal                  |
| KEGG          | 203.13 | 1205.2  | cpd:C17253 | 9-Methylthiononanaloxime                      |
| KEGG          | 426.19 | 695.59  | cpd:C15970 | Abscisic acid glucose ester                   |
| KEGG          | 151.06 | 109.55  | cpd:C06804 | Acetaminophen                                 |
| KEGG          | 60.02  | 112.57  | cpd:C00033 | Acetate                                       |
| KEGG          | 324.11 | 91.84   | cpd:C06806 | Acetohexamide                                 |
| KEGG          | 313.13 | 94.22   | cpd:C08513 | Acetylcarnine                                 |
| KEGG          | 811.3  | 852.97  | cpd:C18638 | Aclacinomycin A                               |
| KEGG          | 311.12 | 106.17  | cpd:C10629 | Acronidine                                    |
| KEGG          | 443.01 | 77.62   | cpd:C13743 | Adenosine 5-O-(3-thiodiphosphate)             |
| KEGG          | 550.28 | 1156.08 | cpd:C08843 | Adonitoxin                                    |
| KEGG          | 582.41 | 1382.23 | cpd:C15968 | Adonixanthin                                  |
| KEGG          | 500.34 | 1237.99 | cpd:C09993 | Adouetine X                                   |
| KEGG          | 298.08 | 93.44   | cpd:C10199 | Afrormosin                                    |
| KEGG          | 546.2  | 643.19  | cpd:C10209 | Afzelechin-(4alpha->8)-afzelechin             |
| KEGG          | 474.2  | 633.13  | cpd:C10671 | Agrimophol                                    |
| KEGG          | 399.1  | 105.69  | cpd:C18414 | Alanycarb                                     |
| KEGG          | 480.16 | 642.62  | cpd:C17457 | Albiflorin                                    |
| KEGG          | 256.12 | 910.21  | cpd:C20520 | Albonoursin                                   |
| KEGG          | 388.15 | 816.55  | cpd:C09059 | Alectrol                                      |
| KEGG          | 472.36 | 1197.59 | cpd:C17460 | Alisol B                                      |
| KEGG/MASSBANK | 173.06 | 93.66   | cpd:C19043 | Allidochlor                                   |
| KEGG/MASSBANK | 622.27 | 1428.75 | cpd:C05346 | Allosamidine 5-L-Arabinotriose                |
| KEGG/MASSBANK | 654.38 | 1193.46 | cpd:C04216 | all-trans-Heptaprenyl diphosphate             |
| KEGG/MASSBANK | 564.18 | 89.43   | cpd:C17779 | Aloinoside A                                  |
| KEGG/MASSBANK | 414.14 | 609.89  | cpd:C20571 | alpha-1                                       |
| KEGG/MASSBANK | 566.27 | 981.29  | cpd:C08847 | alpha-Antiarin                                |
| KEGG/MASSBANK | 110.01 | 1789.11 | cpd:C18676 | alpha-Chlorohydrin                            |
| KEGG/MASSBANK | 387.2  | 370.39  | cpd:C16544 | alpha-Hydroxytamoxifen                        |
| KEGG/MASSBANK | 118.08 | 90.03   | cpd:C14395 | alpha-Methylstyrene                           |
| KEGG/MASSBANK | 308.08 | 722.76  | cpd:C06817 | Alprazolam                                    |
| KEGG/MASSBANK | 716.4  | 1204.6  | cpd:C08433 | Amataine                                      |
| KEGG/MASSBANK | 536.3  | 1177.64 | cpd:C07773 | Ambenonium                                    |
| KEGG/MASSBANK | 220.05 | 100.75  | cpd:C11490 | AMCC                                          |

|               |        |         |            |                                                       |
|---------------|--------|---------|------------|-------------------------------------------------------|
| KEGG/MASSBANK | 59.04  | 1757.37 | cpd:C06735 | Aminoacetaldehyde                                     |
| KEGG/MASSBANK | 73.05  | 1761.96 | cpd:C01888 | Aminoacetone                                          |
| KEGG/MASSBANK | 293.19 | 1133.54 | cpd:C10995 | Amitraz                                               |
| KEGG/MASSBANK | 435.24 | 682.04  | cpd:C12342 | Ancistrobrevine A                                     |
| KEGG/MASSBANK | 426.1  | 1032.91 | cpd:C02811 | Anhydrotetracycline                                   |
| KEGG/MASSBANK | 275.2  | 1057.04 | cpd:C09852 | Annotine                                              |
| KEGG/MASSBANK | 584.42 | 1383.5  | cpd:C08579 | Antheraxanthin                                        |
| KEGG/MASSBANK | 207.08 | 428.3   | cpd:C15549 | Anthocyanin                                           |
| KEGG/MASSBANK | 208.05 | 1779.7  | cpd:C16207 | Anthraquinone                                         |
| KEGG/MASSBANK | 270.05 | 886.83  | cpd:C01477 | Apigenin                                              |
| KEGG/MASSBANK | 564.15 | 744.58  | cpd:C04858 | Apigenin 7-O-[beta-D-apiosyl-(1->2)-beta-D-glucoside] |
| KEGG/MASSBANK | 578.16 | 687.69  | cpd:C12627 | Apigenin 7-O-neohesperidoside                         |
| KEGG/MASSBANK | 294.06 | 718.22  | cpd:C17132 | Aplysin                                               |
| KEGG/MASSBANK | 582.28 | 633.23  | cpd:C09999 | Aralionine A                                          |
| KEGG/MASSBANK | 426.2  | 189.46  | cpd:C09116 | Archangelicin                                         |
| KEGG/MASSBANK | 744.48 | 1737.04 | cpd:C20094 | Argiopinil II                                         |
| KEGG/MASSBANK | 659.42 | 1297.05 | cpd:C20095 | Argiopinil III                                        |
| KEGG/MASSBANK | 306.15 | 148.36  | cpd:C09299 | Arnicolide A                                          |
| KEGG/MASSBANK | 488.35 | 1053.73 | cpd:C08617 | Asiatic acid                                          |
| KEGG/MASSBANK | 340.07 | 95.05   | cpd:C17400 | Asparenomycin A                                       |
| KEGG/MASSBANK | 294.12 | 200.39  | cpd:C11045 | Aspartame                                             |
| KEGG/MASSBANK | 582.2  | 850.16  | cpd:C11655 | Asperuloside tetraacetate                             |
| KEGG/MASSBANK | 296.07 | 1120.92 | cpd:C02006 | Aspulvinone E                                         |
| KEGG/MASSBANK | 406.13 | 107.53  | cpd:C10245 | Astringin                                             |
| KEGG/MASSBANK | 216.15 | 915.09  | cpd:C16919 | Atractylone                                           |
| KEGG/MASSBANK | 576.3  | 951.6   | cpd:C17866 | Atractyloside I                                       |
| KEGG/MASSBANK | 287.06 | 133.18  | cpd:C08575 | Aurantidin                                            |
| KEGG/MASSBANK | 492.13 | 768.2   | cpd:C10303 | Aurantio-obtusin beta-D-glucoside                     |
| KEGG/MASSBANK | 556.14 | 772.8   | cpd:C08995 | Aurasperone D                                         |
| KEGG/MASSBANK | 448.1  | 615.65  | cpd:C16409 | Aureusidin 6-O-glucoside                              |
| KEGG/MASSBANK | 450.15 | 115.45  | cpd:C09478 | Auriculoside                                          |
| KEGG/MASSBANK | 685.4  | 1272.82 | cpd:C08661 | Avadharidine                                          |
| KEGG/MASSBANK | 584.33 | 1024.29 | cpd:C11964 | Avermectin A1b aglycone                               |
| KEGG/MASSBANK | 732.41 | 1347.61 | cpd:C11957 | Avermectin B2b monosaccharide                         |
| KEGG/MASSBANK | 381.16 | 115     | cpd:C07768 | Azelastine                                            |
| KEGG/MASSBANK | 748.51 | 1736.46 | cpd:C06838 | Azithromycin                                          |
| KEGG/MASSBANK | 270.12 | 953.39  | cpd:C20942 | Bacilysin                                             |
| KEGG/MASSBANK | 446.1  | 661.54  | cpd:C10025 | Baicalin                                              |
| KEGG/MASSBANK | 520.22 | 819.09  | cpd:C07813 | Beclomethasone dipropionate                           |
| KEGG/MASSBANK | 322.98 | 77.29   | cpd:C18907 | Benodanil                                             |
| KEGG/MASSBANK | 410.09 | 638.69  | cpd:C10937 | Bensulfuron-methyl                                    |
| KEGG/MASSBANK | 381.15 | 113.87  | cpd:C18415 | Benthiavalicarb isopropyl                             |
| KEGG/MASSBANK | 118.05 | 125.88  | cpd:C02009 | Benzimidazole                                         |
| KEGG/MASSBANK | 226.08 | 101.4   | cpd:C19342 | Benzo[ghi]fluoranthene                                |
| KEGG/MASSBANK | 430.1  | 209.48  | cpd:C18555 | Benzofenap                                            |
| KEGG/MASSBANK | 118.04 | 949.14  | cpd:C14512 | Benzofuran                                            |
| KEGG/MASSBANK | 103.04 | 87      | cpd:C09814 | Benzonitrile                                          |
| KEGG/MASSBANK | 363.09 | 251.75  | cpd:C19021 | Benzoximate                                           |
| KEGG/MASSBANK | 234.15 | 1781.63 | cpd:C02253 | Benzoylagmatine                                       |
| KEGG/MASSBANK | 366.27 | 1298.96 | cpd:C06847 | Bepriidil                                             |

|               |        |         |            |                                             |
|---------------|--------|---------|------------|---------------------------------------------|
| KEGG/MASSBANK | 608.29 | 1556.32 | cpd:C09357 | Berbamine                                   |
| KEGG/MASSBANK | 352.12 | 125.85  | cpd:C09360 | Berberastine                                |
| KEGG/MASSBANK | 162.09 | 111.6   | cpd:C08234 | beta-Cymaropyranose                         |
| KEGG/MASSBANK | 532.41 | 1591.45 | cpd:C16340 | beta-Isorenieratene                         |
| KEGG/MASSBANK | 388.09 | 109.48  | cpd:C08539 | Betanidin                                   |
| KEGG/MASSBANK | 550.14 | 89.84   | cpd:C08540 | Betanin                                     |
| KEGG/MASSBANK | 119.02 | 90.89   | cpd:C05669 | beta-Nitropropanoate                        |
| KEGG/MASSBANK | 428.1  | 636.69  | cpd:C10730 | beta-Peltatin A methyl ether                |
| KEGG/MASSBANK | 233.08 | 105.49  | cpd:C19347 | Bis(1-aziridiny)morpholinophosphine sulfide |
| KEGG/MASSBANK | 352.03 | 109     | cpd:C14346 | Bisphenol A bis(chloroformate)              |
| KEGG/MASSBANK | 264.11 | 113.51  | cpd:C17967 | Bluensidine                                 |
| KEGG/MASSBANK | 370.32 | 1134.64 | cpd:C15119 | B-Norcholest-4-en-3-one                     |
| KEGG/MASSBANK | 266.14 | 1357.87 | cpd:C09052 | Borreline                                   |
| KEGG/MASSBANK | 406.11 | 674.8   | cpd:C14647 | Braxoron                                    |
| KEGG/MASSBANK | 283.13 | 1775.21 | cpd:C20563 | Brevianamide F                              |
| KEGG/MASSBANK | 573.2  | 684.13  | cpd:C13851 | BRL 32872                                   |
| KEGG/MASSBANK | 522.08 | 83.93   | cpd:C18694 | Brodifacoum                                 |
| KEGG/MASSBANK | 548.2  | 760.54  | cpd:C08749 | Bruceantin                                  |
| KEGG/MASSBANK | 682    | 77.44   | cpd:C08753 | Bruceoside A                                |
| KEGG/MASSBANK | 273.09 | 85.84   | cpd:C10849 | Brugine                                     |
| KEGG/MASSBANK | 374.14 | 284.87  | cpd:C09351 | Budlein A                                   |
| KEGG/MASSBANK | 288.22 | 922.81  | cpd:C07529 | Bupivacaine                                 |
| KEGG/MASSBANK | 385.25 | 1014.59 | cpd:C06861 | Buspirone                                   |
| KEGG/MASSBANK | 88.05  | 694.44  | cpd:C00246 | Butanoic acid                               |
| KEGG/MASSBANK | 226.12 | 913.94  | cpd:C19142 | Butopyronoxyl                               |
| KEGG/MASSBANK | 596.17 | 701.6   | cpd:C09616 | Butrin                                      |
| KEGG/MASSBANK | 470.19 | 118.48  | cpd:C08997 | Butyrylmallotochromene                      |
| KEGG/MASSBANK | 306.17 | 1005.52 | cpd:C01670 | Bz-Arg-OEt                                  |
| KEGG/MASSBANK | 194    | 1794.01 | cpd:C07481 | Caffeine                                    |
| KEGG/MASSBANK | 99.95  | 82.57   | cpd:C08129 | Calcium carbonate                           |
| KEGG/MASSBANK | 109.9  | 85.43   | cpd:C08130 | Calcium chloride anhydrous                  |
| KEGG/MASSBANK | 270.04 | 876.28  | cpd:C18380 | Calcium levulinate anhydrous                |
| KEGG/MASSBANK | 416.16 | 587.09  | cpd:C09158 | Calophyllolide                              |
| KEGG/MASSBANK | 348.11 | 86.38   | cpd:C01897 | Camptothecin                                |
| KEGG/MASSBANK | 606.24 | 1351.5  | cpd:C09370 | Cancentrine                                 |
| KEGG/MASSBANK | 440.16 | 188.96  | cpd:C07468 | Candesartan                                 |
| KEGG/MASSBANK | 596.2  | 655.07  | cpd:C17906 | Cannabisin B                                |
| KEGG/MASSBANK | 624.2  | 91.5    | cpd:C17908 | Cannabisin D                                |
| KEGG/MASSBANK | 359.1  | 96.94   | cpd:C12650 | Capecitabine                                |
| KEGG/MASSBANK | 236.18 | 1086.44 | cpd:C09627 | Capsidiol                                   |
| KEGG/MASSBANK | 428.19 | 624.83  | cpd:C09106 | Carapanaubine                               |
| KEGG/MASSBANK | 61.02  | 78.32   | cpd:C01563 | Carbamate                                   |
| KEGG/MASSBANK | 221.11 | 1716.12 | cpd:C14291 | Carbofuran                                  |
| KEGG/MASSBANK | 580.14 | 248.8   | cpd:C10026 | Carlinoside                                 |
| KEGG/MASSBANK | 213.01 | 111.3   | cpd:C06873 | Carmustine                                  |
| KEGG/MASSBANK | 330.18 | 1160.21 | cpd:C09069 | Carnosol                                    |
| KEGG/MASSBANK | 189.1  | 98.93   | cpd:C02256 | Castanospermine                             |
| KEGG/MASSBANK | 482.1  | 682.99  | cpd:C09775 | Catalposide                                 |
| KEGG/MASSBANK | 398.13 | 692.72  | cpd:C17097 | Caulerpin                                   |
| KEGG/MASSBANK | 204.02 | 89.57   | cpd:C11164 | CCCP                                        |

|               |        |         |            |                                                                                |
|---------------|--------|---------|------------|--------------------------------------------------------------------------------|
| KEGG/MASSBANK | 488.1  | 119.2   | cpd:C00307 | CDP-choline                                                                    |
| KEGG/MASSBANK | 460.08 | 85      | cpd:C03486 | CDP-N-methylethanolamine                                                       |
| KEGG/MASSBANK | 739.4  | 1154.97 | cpd:C15822 | CE-108                                                                         |
| KEGG/MASSBANK | 304.12 | 964.31  | cpd:C09130 | Ceceline                                                                       |
| KEGG/MASSBANK | 480.12 | 109.46  | cpd:C08111 | Cefepime                                                                       |
| KEGG/MASSBANK | 427.1  | 1073.1  | cpd:C06887 | Cefoxitin                                                                      |
| KEGG/MASSBANK | 514    | 1721.24 | cpd:C11199 | Cefpirome                                                                      |
| KEGG/MASSBANK | 410.04 | 114.57  | cpd:C08117 | Ceftibuten                                                                     |
| KEGG/MASSBANK | 379.23 | 1153.25 | cpd:C10578 | Celabenzine                                                                    |
| KEGG/MASSBANK | 606.27 | 1542.61 | cpd:C09391 | Cepharanthine                                                                  |
| KEGG/MASSBANK | 534.15 | 92.22   | cpd:C10309 | Cercosporin                                                                    |
| KEGG/MASSBANK | 223.12 | 1756.12 | cpd:C12058 | Cerulenin                                                                      |
| KEGG/MASSBANK | 349.21 | 719.76  | cpd:C13786 | Cetiedil                                                                       |
| KEGG/MASSBANK | 320.99 | 73.11   | cpd:C14128 | CGH 2466                                                                       |
| KEGG/MASSBANK | 184.13 | 916.87  | cpd:C09633 | Chamazulene                                                                    |
| KEGG/MASSBANK | 474.1  | 758     | cpd:C10437 | Chicoric acid                                                                  |
| KEGG/MASSBANK | 424.17 | 591.51  | cpd:C01674 | Chitobiose                                                                     |
| KEGG/MASSBANK | 414.04 | 110.84  | cpd:C10943 | Chlorimuron-ethyl                                                              |
| KEGG/MASSBANK | 233.97 | 1789.64 | cpd:C18686 | Chlormephos                                                                    |
| KEGG/MASSBANK | 314.09 | 129.71  | cpd:C09358 | Chlorochrymorin                                                                |
| KEGG/MASSBANK | 64.01  | 1724.82 | cpd:C18248 | Chloroethane                                                                   |
| KEGG/MASSBANK | 628.22 | 655.81  | cpd:C16541 | Chlorophyllide b                                                               |
| KEGG/MASSBANK | 212.07 | 131.78  | cpd:C18817 | Chlorotoluron                                                                  |
| KEGG/MASSBANK | 390.1  | 108.48  | cpd:C07780 | Chlorpheniramine maleate                                                       |
| KEGG/MASSBANK | 104    | 1721.58 | cpd:C00114 | Choline                                                                        |
| KEGG/MASSBANK | 184.07 | 251.99  | cpd:C00588 | Choline phosphate                                                              |
| KEGG/MASSBANK | 226.05 | 95.58   | cpd:C00251 | Chorismate                                                                     |
| KEGG/MASSBANK | 449.1  | 733.72  | cpd:C08604 | Chrysanthemin                                                                  |
| KEGG/MASSBANK | 254.19 | 1053.95 | cpd:C17610 | Chrysanthetriol                                                                |
| KEGG/MASSBANK | 416.11 | 90.19   | cpd:C10316 | Chrysophanol 8-O-beta-D-glucoside                                              |
| KEGG/MASSBANK | 358.16 | 602.21  | cpd:C01675 | Cilastatin                                                                     |
| KEGG/MASSBANK | 452.1  | 668.29  | cpd:C10217 | Cinchonain 1a                                                                  |
| KEGG/MASSBANK | 430.21 | 705.88  | cpd:C10762 | Cinegalline 2-Dihydronaph 2-diol                                               |
| KEGG/MASSBANK | 148.05 | 1131.65 | cpd:C10438 | Cinnamic acid 11b-Hexahydro-9-methoxy-2H-benzo[a]quinolizine-3-carboxylic acid |
| KEGG/MASSBANK | 385.12 | 89.67   | cpd:C13993 | Ciprofloxacin hydrochloride                                                    |
| KEGG/MASSBANK | 162.07 | 1240.29 | cpd:C04314 | cis-1 3-Dihydrodiol 11-Trichloro-2 2-bis(4'-chlorophenyl)ethane                |
| KEGG/MASSBANK | 261.14 | 1250.01 | cpd:C15462 | cis-1                                                                          |
| KEGG/MASSBANK | 212.18 | 735.14  | cpd:C18206 | cis-11-Methyl-2-dodecenoic acid                                                |
| KEGG/MASSBANK | 385.92 | 1742.15 | cpd:C06649 | cis-2                                                                          |
| KEGG/MASSBANK | 304.06 | 700.89  | cpd:C12316 | cis-Dihydroquercetin                                                           |
| KEGG/MASSBANK | 747.5  | 1737.15 | cpd:C06912 | Clarithromycin                                                                 |
| KEGG/MASSBANK | 198    | 1789.88 | cpd:C06660 | Clavaminic acid                                                                |
| KEGG/MASSBANK | 446.2  | 349.06  | cpd:C13810 | Clavulone I                                                                    |
| KEGG/MASSBANK | 504.1  | 110.11  | cpd:C11728 | Clindamycin pr 8-dideoxy-beta-D-manno-octulosonate                             |
| KEGG/MASSBANK | 472.12 | 773.16  | cpd:C06915 | Clofazimine                                                                    |
| KEGG/MASSBANK | 292.1  | 116.11  | cpd:C19070 | Clofop                                                                         |
| KEGG/MASSBANK | 542.13 | 105.6   | cpd:C21334 | CMP-8-amino-3                                                                  |
| KEGG/MASSBANK | 865.52 | 1372.03 | cpd:C15761 | Concanamycin A                                                                 |
| KEGG/MASSBANK | 540.31 | 969.59  | cpd:C17766 | Condurangenin C                                                                |
| KEGG/MASSBANK | 712.33 | 1079.99 | cpd:C19986 | Convalloside                                                                   |

|               |        |         |            |                                                         |
|---------------|--------|---------|------------|---------------------------------------------------------|
| KEGG/MASSBANK | 442.17 | 655.37  | cpd:C02822 | Cortisol 21-sulfate                                     |
| KEGG/MASSBANK | 192.08 | 553.28  | cpd:C20465 | Coumaryl acetate                                        |
| KEGG/MASSBANK | 291.08 | 351.95  | cpd:C18972 | Crufomate                                               |
| KEGG/MASSBANK | 480.11 | 629.63  | cpd:C17880 | Cryptocyanin                                            |
| KEGG/MASSBANK | 261.21 | 1287.22 | cpd:C10139 | Cryptophorine                                           |
| KEGG/MASSBANK | 518.32 | 1142.11 | cpd:C08798 | Cucurbitacin F                                          |
| KEGG/MASSBANK | 120.1  | 1296.57 | cpd:C14396 | Cumene 7-di-O-beta-D-glucoside                          |
| KEGG/MASSBANK | 310.17 | 1304.88 | cpd:C06530 | Cupreine                                                |
| KEGG/MASSBANK | 611.14 | 647.4   | cpd:C16369 | Cyanidin 3-(6-p-caffeoyl)glucoside                      |
| KEGG/MASSBANK | 611.16 | 673.83  | cpd:C20469 | Cyanidin 3                                              |
| KEGG/MASSBANK | 595.15 | 636.38  | cpd:C12095 | Cyanidin 3-O-(6-O-p-coumaroyl)glucoside                 |
| KEGG/MASSBANK | 581.15 | 312.77  | cpd:C20468 | Cyanidin 3-O-(beta-D-xylosyl-(1->2)-beta-D-galactoside) |
| KEGG/MASSBANK | 294.08 | 124.74  | cpd:C18974 | Cyanthoate                                              |
| KEGG/MASSBANK | 266.18 | 1282.73 | cpd:C06930 | Cyclizine                                               |
| KEGG/MASSBANK | 185.06 | 119.85  | cpd:C19117 | Cyometrinil                                             |
| KEGG/MASSBANK | 166.1  | 880.26  | cpd:C14147 | Cyromazine                                              |
| KEGG/MASSBANK | 479.27 | 757.86  | cpd:C19954 | Cytochalasin B                                          |
| KEGG/MASSBANK | 178.14 | 933.47  | cpd:C01487 | D-Allose                                                |
| KEGG/MASSBANK | 580.26 | 634.58  | cpd:C09418 | Daphnoline                                              |
| KEGG/MASSBANK | 624.3  | 1427.03 | cpd:C09419 | Dauricine                                               |
| KEGG/MASSBANK | 307.06 | 77.64   | cpd:C00239 | dCMP                                                    |
| KEGG/MASSBANK | 523.2  | 664.7   | cpd:C07307 | Deacetylpecoside                                        |
| KEGG/MASSBANK | 368.08 | 108.09  | cpd:C20022 | Decarbamoylgonyautoxin 1                                |
| KEGG/MASSBANK | 478.28 | 1171.99 | cpd:C07996 | Dehydroemetine                                          |
| KEGG/MASSBANK | 552.18 | 93.55   | cpd:C08087 | Delavirdine mesylate                                    |
| KEGG/MASSBANK | 479.29 | 1238.72 | cpd:C08675 | Delcorine                                               |
| KEGG/MASSBANK | 453.27 | 1210.47 | cpd:C08676 | Delcosine                                               |
| KEGG/MASSBANK | 597.15 | 631.22  | cpd:C20491 | Delphinidin 3-O-beta-D-sambubioside                     |
| KEGG/MASSBANK | 465.1  | 689.6   | cpd:C12138 | Delphinidin 3-O-glucoside                               |
| KEGG/MASSBANK | 402.3  | 1012.86 | cpd:C14151 | delta-Tocopherol                                        |
| KEGG/MASSBANK | 438.35 | 1386.3  | cpd:C21084 | Demethylphyllquinol                                     |
| KEGG/MASSBANK | 97.1   | 1666.13 | cpd:C02026 | Deoxycytosine                                           |
| KEGG/MASSBANK | 252.1  | 105.95  | cpd:C05512 | Deoxyinosine                                            |
| KEGG/MASSBANK | 496.18 | 611.12  | cpd:C16725 | Deoxypumiloside                                         |
| KEGG/MASSBANK | 134.1  | 746.03  | cpd:C01801 | Deoxyribose                                             |
| KEGG/MASSBANK | 578.26 | 1166.28 | cpd:C06541 | Deserpidine                                             |
| KEGG/MASSBANK | 329.09 | 90.37   | cpd:C01069 | Desulfoglucotropeolin                                   |
| KEGG/MASSBANK | 598.16 | 108.88  | cpd:C12961 | Dexamethazone metasulfobenzoate sodium                  |
| KEGG/MASSBANK | 179.97 | 82.17   | cpd:C00095 | D-Fructose                                              |
| KEGG/MASSBANK | 181.05 | 87.6    | cpd:C00124 | D-Galactose                                             |
| KEGG/MASSBANK | 210.04 | 89.26   | cpd:C00818 | D-Glucarate                                             |
| KEGG/MASSBANK | 180.1  | 984.68  | cpd:C00031 | D-Glucose                                               |
| KEGG/MASSBANK | 86.04  | 913.6   | cpd:C00741 | Diacetyl                                                |
| KEGG/MASSBANK | 361.18 | 1149.74 | cpd:C12886 | Dialicor                                                |
| KEGG/MASSBANK | 229.99 | 93.6    | cpd:C06949 | Diazoxide                                               |
| KEGG/MASSBANK | 184.03 | 236.65  | cpd:C20125 | Dibenzothiophene                                        |
| KEGG/MASSBANK | 298.12 | 1020.48 | cpd:C07332 | Dibenzylsuccinate                                       |
| KEGG/MASSBANK | 268.01 | 1720.83 | cpd:C14292 | Dichlorophen                                            |
| KEGG/MASSBANK | 303.91 | 1742.42 | cpd:C07459 | Dichlorphenamide                                        |
| KEGG/MASSBANK | 327.09 | 94.51   | cpd:C11235 | Diclobutrazol                                           |

|               |        |         |            |                                                  |
|---------------|--------|---------|------------|--------------------------------------------------|
| KEGG/MASSBANK | 340.03 | 114.77  | cpd:C11021 | Diclofop methyl                                  |
| KEGG/MASSBANK | 412.02 | 111.52  | cpd:C01344 | dIDP                                             |
| KEGG/MASSBANK | 106.06 | 693.35  | cpd:C14689 | Diethylene glycol                                |
| KEGG/MASSBANK | 444.17 | 108.37  | cpd:C16807 | Difenacoum                                       |
| KEGG/MASSBANK | 796.4  | 1184.52 | cpd:C08861 | Diginatin                                        |
| KEGG/MASSBANK | 764    | 77.8    | cpd:C06955 | Digitoxin                                        |
| KEGG/MASSBANK | 208.06 | 628.23  | cpd:C02147 | Dihydrolipoate                                   |
| KEGG/MASSBANK | 314.11 | 87.86   | cpd:C00921 | Dihydropteroate                                  |
| KEGG/MASSBANK | 338.11 | 114.89  | cpd:C18783 | Dimefuron                                        |
| KEGG/MASSBANK | 541.2  | 674.64  | cpd:C13441 | Dimethylaminoethyl reserpilinate dihydrochloride |
| KEGG/MASSBANK | 146.08 | 690.65  | cpd:C03114 | Dimethylbenzimidazole                            |
| KEGG/MASSBANK | 121.03 | 674.75  | cpd:C03392 | Dimethylsulfonioacetate                          |
| KEGG/MASSBANK | 374.08 | 104.76  | cpd:C10332 | Diospyrin                                        |
| KEGG/MASSBANK | 452.25 | 632.84  | cpd:C07872 | Diphenoxylate                                    |
| KEGG/MASSBANK | 274.03 | 90.58   | cpd:C18400 | Disulfoton                                       |
| KEGG/MASSBANK | 154.01 | 1782.63 | cpd:C00950 | Dithioerythritol                                 |
| KEGG/MASSBANK | 150.04 | 89.7    | cpd:C00476 | D-Lyxose                                         |
| KEGG/MASSBANK | 566.28 | 674.03  | cpd:C15662 | Dmp 323                                          |
| KEGG/MASSBANK | 318.06 | 108.95  | cpd:C07488 | DMPP                                             |
| KEGG/MASSBANK | 340.3  | 1347.54 | cpd:C08281 | Docosanoic acid                                  |
| KEGG/MASSBANK | 199.19 | 1188.52 | cpd:C13831 | Dodecanamide                                     |
| KEGG/MASSBANK | 153.08 | 107.43  | cpd:C03758 | Dopamine                                         |
| KEGG/MASSBANK | 195    | 1785.43 | cpd:C00822 | Dopaquinone                                      |
| KEGG/MASSBANK | 279.16 | 1270.62 | cpd:C06971 | Doxepin 6-dideoxy-L-erythro-hexos-3-ulose        |
| KEGG/MASSBANK | 444.15 | 648.09  | cpd:C06973 | Doxycycline                                      |
| KEGG/MASSBANK | 150.02 | 148.45  | cpd:C00121 | D-Ribose                                         |
| KEGG/MASSBANK | 530.07 | 679.93  | cpd:C11932 | dTDP-2                                           |
| KEGG/MASSBANK | 532.09 | 668.28  | cpd:C18636 | dTDP-2-deoxy-beta-L-fucose                       |
| KEGG/MASSBANK | 275.12 | 814.37  | cpd:C10662 | Dubinidine                                       |
| KEGG/MASSBANK | 150.05 | 88.33   | cpd:C00181 | D-Xylose                                         |
| KEGG/MASSBANK | 475.14 | 86.74   | cpd:C11595 | E3040 glucuronide                                |
| KEGG/MASSBANK | 550.42 | 1590.26 | cpd:C08592 | Echinenone                                       |
| KEGG/MASSBANK | 231.05 | 88.93   | cpd:C19102 | Eglinazine                                       |
| KEGG/MASSBANK | 476.27 | 1120.61 | cpd:C09420 | Emetamine                                        |
| KEGG/MASSBANK | 578.14 | 280.61  | cpd:C10221 | Epicatechin-(4beta->8)-ent-epicatechin           |
| KEGG/MASSBANK | 329.07 | 208.03  | cpd:C11229 | Epoxiconazole                                    |
| KEGG/MASSBANK | 608.26 | 1359.24 | cpd:C21192 | Epoxyphosphorbide a                              |
| KEGG/MASSBANK | 585.22 | 844.87  | cpd:C18640 | epsilon-Rhodomyacin T                            |
| KEGG/MASSBANK | 230.1  | 138.43  | cpd:C05570 | Ergothioneine                                    |
| KEGG/MASSBANK | 419.1  | 136.08  | cpd:C18147 | Esfenvalerate                                    |
| KEGG/MASSBANK | 396.27 | 1539.62 | cpd:C14640 | Estradiol 17beta-cyclopentylpropionate           |
| KEGG/MASSBANK | 144.03 | 90.87   | cpd:C07833 | Ethchlorvynol                                    |
| KEGG/MASSBANK | 286.09 | 1278    | cpd:C18829 | Ethofumesate                                     |
| KEGG/MASSBANK | 398.09 | 102.97  | cpd:C18440 | Ethoxysulfuron                                   |
| KEGG/MASSBANK | 215.15 | 893.43  | cpd:C18830 | Ethyl 3-(N-butylacetamido)propionate             |
| KEGG/MASSBANK | 292.06 | 85.22   | cpd:C18985 | Etrimfos                                         |
| KEGG/MASSBANK | 245.98 | 98.19   | cpd:C17169 | Eudistomin N                                     |
| KEGG/MASSBANK | 412.13 | 610.59  | cpd:C09416 | Eupachlorin                                      |
| KEGG/MASSBANK | 450.09 | 111.44  | cpd:C10593 | Exserohilone                                     |
| KEGG/MASSBANK | 374.13 | 85.77   | cpd:C18591 | Famoxadone                                       |

|               |        |         |            |                                                                             |
|---------------|--------|---------|------------|-----------------------------------------------------------------------------|
| KEGG/MASSBANK | 723.46 | 1402.89 | cpd:C19957 | Fasciculol E                                                                |
| KEGG/MASSBANK | 253.2  | 1061.41 | cpd:C11207 | Fenapanil                                                                   |
| KEGG/MASSBANK | 360.11 | 89.32   | cpd:C07586 | Fenofibrate                                                                 |
| KEGG/MASSBANK | 522.14 | 837.22  | cpd:C02539 | Fenoprofen calcium                                                          |
| KEGG/MASSBANK | 361.1  | 109.42  | cpd:C11024 | Fenoxaprop-ethyl                                                            |
| KEGG/MASSBANK | 278.02 | 86.53   | cpd:C14420 | Fenthion                                                                    |
| KEGG/MASSBANK | 310.06 | 627.94  | cpd:C17135 | Filiforminol                                                                |
| KEGG/MASSBANK | 435.94 | 79.44   | cpd:C11099 | Fipronil                                                                    |
| KEGG/MASSBANK | 224    | 79.37   | cpd:C00766 | Flavanone                                                                   |
| KEGG/MASSBANK | 206.02 | 106.1   | cpd:C18012 | Flaviolin                                                                   |
| KEGG/MASSBANK | 238    | 106.77  | cpd:C01495 | Flavonol                                                                    |
| KEGG/MASSBANK | 562.17 | 701.27  | cpd:C15581 | Flavonol 3-O-beta-D-glucosyl-(1->2)-beta-D-glucoside                        |
| KEGG/MASSBANK | 724.22 | 686.73  | cpd:C15582 | Flavonol 3-O-beta-D-glucosyl-(1->2)-beta-D-glucosyl-(1->2)-beta-D-glucoside |
| KEGG/MASSBANK | 451.16 | 115.59  | cpd:C14524 | Flucythrinate                                                               |
| KEGG/MASSBANK | 258.11 | 120.65  | cpd:C19031 | Fluental                                                                    |
| KEGG/MASSBANK | 488.04 | 74.67   | cpd:C18430 | Flufenoxuron                                                                |
| KEGG/MASSBANK | 494.2  | 677.49  | cpd:C07007 | Fluocinonide                                                                |
| KEGG/MASSBANK | 166.08 | 118.8   | cpd:C07715 | Fluorene                                                                    |
| KEGG/MASSBANK | 502.1  | 634.72  | cpd:C10989 | Fluvalinate                                                                 |
| KEGG/MASSBANK | 82.05  | 1327.02 | cpd:C07837 | Fomepizole                                                                  |
| KEGG/MASSBANK | 776.28 | 759.13  | cpd:C01001 | Formylmethanofuran                                                          |
| KEGG/MASSBANK | 356.09 | 91.32   | cpd:C12451 | Fridamycin E                                                                |
| KEGG/MASSBANK | 312.22 | 1106.06 | cpd:C09191 | Fruticosonine                                                               |
| KEGG/MASSBANK | 116    | 97.73   | cpd:C00122 | Fumarate                                                                    |
| KEGG/MASSBANK | 479.24 | 853.13  | cpd:C20630 | Fumitremorgin B                                                             |
| KEGG/MASSBANK | 288.05 | 647.8   | cpd:C14304 | Furamizole                                                                  |
| KEGG/MASSBANK | 225.04 | 88.52   | cpd:C07999 | Furazolidone                                                                |
| KEGG/MASSBANK | 170    | 107.32  | cpd:C01424 | Gallate                                                                     |
| KEGG/MASSBANK | 562.15 | 741.03  | cpd:C17775 | Gambirini B1                                                                |
| KEGG/MASSBANK | 684    | 77.35   | cpd:C18005 | gamma-L-Gluta 6-dideoxy-alpha-D-mannose                                     |
| KEGG/MASSBANK | 250.06 | 110.71  | cpd:C00669 | gamma-L-Glutamyl-L-cysteine                                                 |
| KEGG/MASSBANK | 396.16 | 716.23  | cpd:C10063 | Gartanin                                                                    |
| KEGG/MASSBANK | 630.11 | 721.1   | cpd:C20672 | GDP-4-acetamido-4                                                           |
| KEGG/MASSBANK | 601.1  | 667.57  | cpd:C21368 | GDP-valienol                                                                |
| KEGG/MASSBANK | 263.07 | 83.55   | cpd:C07650 | Gemcitabine                                                                 |
| KEGG/MASSBANK | 388.14 | 796.23  | cpd:C09781 | Geniposide                                                                  |
| KEGG/MASSBANK | 598.19 | 700.48  | cpd:C11639 | Geniposide pentaacetate                                                     |
| KEGG/MASSBANK | 566.12 | 82.19   | cpd:C10048 | Ginkgetin                                                                   |
| KEGG/MASSBANK | 440.1  | 715.21  | cpd:C07603 | Ginkgolide C                                                                |
| KEGG/MASSBANK | 638.44 | 1433.97 | cpd:C20780 | Ginsenoside F1                                                              |
| KEGG/MASSBANK | 347.03 | 75.91   | cpd:C08413 | Glucopediin                                                                 |
| KEGG/MASSBANK | 610.18 | 664.39  | cpd:C19690 | Glutathione amide disulfide                                                 |
| KEGG/MASSBANK | 424.37 | 1633.72 | cpd:C16967 | Glutinone                                                                   |
| KEGG/MASSBANK | 338.28 | 1327.99 | cpd:C19426 | Glycidyl oleate                                                             |
| KEGG/MASSBANK | 76     | 402.6   | cpd:C00160 | Glycolate                                                                   |
| KEGG/MASSBANK | 518.19 | 751.17  | cpd:C07667 | Gossypol                                                                    |
| KEGG/MASSBANK | 444.11 | 163.07  | cpd:C06799 | Granaticin                                                                  |
| KEGG/MASSBANK | 417.1  | 680.71  | cpd:C20799 | Grixazone B                                                                 |
| KEGG/MASSBANK | 213.15 | 1130.07 | cpd:C07035 | Guanadrel                                                                   |
| KEGG/MASSBANK | 244.12 | 742.99  | cpd:C06657 | Guanidinoproclavaminic acid                                                 |



|               |        |         |            |                                                        |
|---------------|--------|---------|------------|--------------------------------------------------------|
| KEGG/MASSBANK | 283.09 | 111.8   | cpd:C00387 | Guanosine                                              |
| KEGG/MASSBANK | 510.2  | 649.13  | cpd:C15623 | GW 409544                                              |
| KEGG/MASSBANK | 502.32 | 942.48  | cpd:C15622 | GW 7647                                                |
| KEGG/MASSBANK | 652.29 | 1540.59 | cpd:C09208 | Haplophytine                                           |
| KEGG/MASSBANK | 214.11 | 740.94  | cpd:C06536 | Harmaline                                              |
| KEGG/MASSBANK | 574.29 | 935.88  | cpd:C11225 | Herbimycin                                             |
| KEGG/MASSBANK | 252.16 | 1093.14 | cpd:C10926 | Hexazinone                                             |
| KEGG/MASSBANK | 101.12 | 1720.13 | cpd:C08306 | Hexylamine                                             |
| KEGG/MASSBANK | 440.18 | 251.84  | cpd:C21127 | Holyrine A                                             |
| KEGG/MASSBANK | 569.13 | 610.79  | cpd:C15343 | HR1917                                                 |
| KEGG/MASSBANK | 204.19 | 1293.03 | cpd:C09684 | Humulene                                               |
| KEGG/MASSBANK | 292.07 | 309.93  | cpd:C14204 | Hydroxyflutamide                                       |
| KEGG/MASSBANK | 130.05 | 170.27  | cpd:C01157 | Hydroxyproline                                         |
| KEGG/MASSBANK | 374.18 | 677.05  | cpd:C07045 | Hydroxyzine                                            |
| KEGG/MASSBANK | 536.39 | 1034.89 | cpd:C07608 | Hyperforin                                             |
| KEGG/MASSBANK | 109.02 | 127.15  | cpd:C00519 | Hypotaourine                                           |
| KEGG/MASSBANK | 151.04 | 88.7    | cpd:C02419 | Hypotaurocyamine                                       |
| KEGG/MASSBANK | 454.17 | 649.43  | cpd:C13426 | I-123 BMIPP                                            |
| KEGG/MASSBANK | 356.06 | 109.02  | cpd:C13703 | IAA-94                                                 |
| KEGG/MASSBANK | 308.27 | 1238.19 | cpd:C16525 | Icosadienoic acid                                      |
| KEGG/MASSBANK | 310.29 | 1389.47 | cpd:C16526 | Icosenoic acid                                         |
| KEGG/MASSBANK | 449.22 | 597.89  | cpd:C17485 | Ignavine                                               |
| KEGG/MASSBANK | 469.16 | 662.62  | cpd:C04611 | Indol-3-ylacetyl-myo-inositol L-arabinoside            |
| KEGG/MASSBANK | 312.07 | 676.63  | cpd:C03280 | Inosine-5'-carboxylate                                 |
| KEGG/MASSBANK | 526.17 | 753.12  | cpd:C09114 | Inumakilactone A glycoside                             |
| KEGG/MASSBANK | 506.3  | 1301.49 | cpd:C20009 | Iriomoteolide 1a                                       |
| KEGG/MASSBANK | 522.2  | 658.23  | cpd:C08769 | Isobrucein A                                           |
| KEGG/MASSBANK | 392.22 | 1402.11 | cpd:C09115 | Isodomedin                                             |
| KEGG/MASSBANK | 68.06  | 1669.77 | cpd:C16521 | Isoprene                                               |
| KEGG/MASSBANK | 306.06 | 77.66   | cpd:C11112 | Isoprothiolane sulfoxide                               |
| KEGG/MASSBANK | 528.38 | 1415.72 | cpd:C15943 | Isorenieratene                                         |
| KEGG/MASSBANK | 422.19 | 726.46  | cpd:C16809 | Isovaltrate                                            |
| KEGG/MASSBANK | 416.27 | 1387.3  | cpd:C17989 | Istamycin A3                                           |
| KEGG/MASSBANK | 566.15 | 649.52  | cpd:C18212 | Jamaicamide A                                          |
| KEGG/MASSBANK | 164.12 | 901.03  | cpd:C08490 | Jasmone                                                |
| KEGG/MASSBANK | 565.4  | 1382.18 | cpd:C13931 | JSTX-3                                                 |
| KEGG/MASSBANK | 364.09 | 87.48   | cpd:C10636 | Justicidin B                                           |
| KEGG/MASSBANK | 286.05 | 829.97  | cpd:C05903 | Kaempferol                                             |
| KEGG/MASSBANK | 610.15 | 674.69  | cpd:C12634 | Kaempferol 3-O-beta-D-glucosyl-(1->2)-beta-D-glucoside |
| KEGG/MASSBANK | 740.17 | 703.97  | cpd:C10233 | Kandelin A-1                                           |
| KEGG/MASSBANK | 530.3  | 986.09  | cpd:C17615 | Kukoamine A                                            |
| KEGG/MASSBANK | 490.1  | 706.84  | cpd:C05560 | L-2-Amino adipate adenylate                            |
| KEGG/MASSBANK | 560.23 | 662.7   | cpd:C08870 | Labriformidin                                          |
| KEGG/MASSBANK | 89     | 1790.51 | cpd:C00041 | L-Alanine                                              |
| KEGG/MASSBANK | 406.09 | 1016.58 | cpd:C10075 | Lancerin                                               |
| KEGG/MASSBANK | 832.5  | 1735.87 | cpd:C15679 | Lankamycin                                             |
| KEGG/MASSBANK | 554.2  | 826.1   | cpd:C17686 | Lappaol C                                              |
| KEGG/MASSBANK | 174.11 | 89.54   | cpd:C00062 | L-Arginine                                             |
| KEGG/MASSBANK | 227.08 | 88.74   | cpd:C00826 | L-Arogenate                                            |
| KEGG/MASSBANK | 132.1  | 107.54  | cpd:C00152 | L-Asparagine                                           |

|               |        |         |            |                                      |
|---------------|--------|---------|------------|--------------------------------------|
| KEGG/MASSBANK | 133.04 | 89.62   | cpd:C00049 | L-Aspartate                          |
| KEGG/MASSBANK | 625.3  | 1425.41 | cpd:C02166 | Leukotriene C4                       |
| KEGG/MASSBANK | 236.08 | 107.25  | cpd:C02700 | L-Formylkynurenine                   |
| KEGG/MASSBANK | 146.07 | 89.66   | cpd:C00064 | L-Glutamine                          |
| KEGG/MASSBANK | 196    | 1793.54 | cpd:C00800 | L-Gulonate                           |
| KEGG/MASSBANK | 268.1  | 108.38  | cpd:C01817 | L-Homocystine                        |
| KEGG/MASSBANK | 506.2  | 753.61  | cpd:C01593 | Limonate                             |
| KEGG/MASSBANK | 280.24 | 1242.01 | cpd:C01595 | Linoleate                            |
| KEGG/MASSBANK | 131.1  | 107.15  | cpd:C00407 | L-Isoleucine                         |
| KEGG/MASSBANK | 208.08 | 429.38  | cpd:C00328 | L-Kynurenine                         |
| KEGG/MASSBANK | 132.03 | 1780.46 | cpd:C00123 | L-Leucine                            |
| KEGG/MASSBANK | 146.11 | 1228.01 | cpd:C00047 | L-Lysine                             |
| KEGG/MASSBANK | 149.05 | 87.76   | cpd:C00073 | L-Methionine                         |
| KEGG/MASSBANK | 390.2  | 1014.06 | cpd:C01433 | Loganin                              |
| KEGG/MASSBANK | 422.16 | 345.71  | cpd:C07072 | Losartan                             |
| KEGG/MASSBANK | 314.18 | 1173.45 | cpd:C17567 | Lotusine                             |
| KEGG/MASSBANK | 165.08 | 118.42  | cpd:C00079 | L-Phenylalanine                      |
| KEGG/MASSBANK | 129.08 | 90.24   | cpd:C00408 | L-Pipecolate                         |
| KEGG/MASSBANK | 115.06 | 89.67   | cpd:C00148 | L-Proline                            |
| KEGG/MASSBANK | 105    | 90.38   | cpd:C00065 | L-Serine                             |
| KEGG/MASSBANK | 199.02 | 91.31   | cpd:C12147 | L-Threonine O-3-phosphate            |
| KEGG/MASSBANK | 204.1  | 161.41  | cpd:C00078 | L-Tryptophan                         |
| KEGG/MASSBANK | 181.07 | 96.23   | cpd:C00082 | L-Tyrosine                           |
| KEGG/MASSBANK | 442.18 | 1149.11 | cpd:C10474 | Lusitanicoside                       |
| KEGG/MASSBANK | 574.11 | 125.3   | cpd:C16763 | Luteoskyrin                          |
| KEGG/MASSBANK | 117    | 92      | cpd:C00183 | L-Valine                             |
| KEGG/MASSBANK | 166.05 | 117.84  | cpd:C05411 | L-Xylonate                           |
| KEGG/MASSBANK | 247.19 | 1286.3  | cpd:C09883 | Lycopodine                           |
| KEGG/MASSBANK | 291.07 | 315.33  | cpd:C08531 | Lycoricidine                         |
| KEGG/MASSBANK | 93.92  | 84.99   | cpd:C07755 | Magnesium chloride                   |
| KEGG/MASSBANK | 584.23 | 644.25  | cpd:C03516 | Magnesium protoporphyrin             |
| KEGG/MASSBANK | 113.01 | 92.32   | cpd:C01384 | Maleic acid                          |
| KEGG/MASSBANK | 442.16 | 109.3   | cpd:C09013 | Mallotochromene                      |
| KEGG/MASSBANK | 612.4  | 1723.38 | cpd:C09127 | Mancinellin                          |
| KEGG/MASSBANK | 524.23 | 617.13  | cpd:C09132 | Mascarside                           |
| KEGG/MASSBANK | 390.19 | 996.07  | cpd:C07116 | Meclizine                            |
| KEGG/MASSBANK | 518.14 | 81.16   | cpd:C16224 | Medicarpin 3-O-glucoside-6'-malonate |
| KEGG/MASSBANK | 304.07 | 105.3   | cpd:C19442 | Medphalan                            |
| KEGG/MASSBANK | 378.12 | 87.53   | cpd:C07633 | Mefloquine                           |
| KEGG/MASSBANK | 126.07 | 1737.76 | cpd:C08737 | Melamine                             |
| KEGG/MASSBANK | 522.17 | 89.52   | cpd:C09501 | Melampodin                           |
| KEGG/MASSBANK | 310.11 | 105.68  | cpd:C09502 | Mellitoxin                           |
| KEGG/MASSBANK | 172.05 | 102.84  | cpd:C05377 | Menadione                            |
| KEGG/MASSBANK | 322.15 | 576     | cpd:C12755 | Mequitazine                          |
| KEGG/MASSBANK | 123.95 | 1727.63 | cpd:C07295 | Methanearsonous acid                 |
| KEGG/MASSBANK | 95.99  | 88.11   | cpd:C11145 | Methanesulfonic acid                 |
| KEGG/MASSBANK | 266.05 | 103.43  | cpd:C08506 | Methoxybrassinin                     |
| KEGG/MASSBANK | 354.28 | 1237.64 | cpd:C12280 | Methyl acetyl ricinoleate            |
| KEGG/MASSBANK | 256.05 | 129.64  | cpd:C00225 | Methyl viologen                      |
| KEGG/MASSBANK | 72.02  | 79.06   | cpd:C00546 | Methylglyoxal                        |

|               |        |         |            |                                         |
|---------------|--------|---------|------------|-----------------------------------------|
| KEGG/MASSBANK | 309.19 | 997.96  | cpd:C07915 | Metipranolol                            |
| KEGG/MASSBANK | 429.27 | 1092.41 | cpd:C07652 | Mifepristone                            |
| KEGG/MASSBANK | 352.26 | 1323.84 | cpd:C09137 | Montanol                                |
| KEGG/MASSBANK | 437.15 | 108.61  | cpd:C08054 | Moxifloxacin hydrochloride              |
| KEGG/MASSBANK | 580.17 | 99.35   | cpd:C08928 | Mulberrofuran C                         |
| KEGG/MASSBANK | 420.08 | 106.88  | cpd:C08560 | Musca-aurin-II                          |
| KEGG/MASSBANK | 517    | 75.65   | cpd:C17009 | Mycalamide B                            |
| KEGG/MASSBANK | 727.41 | 1121.93 | cpd:C15680 | Mycinamicin II                          |
| KEGG/MASSBANK | 695.42 | 969.35  | cpd:C18846 | Mycinamicin IV                          |
| KEGG/MASSBANK | 756.2  | 603.27  | cpd:C10479 | Myricoside                              |
| KEGG/MASSBANK | 415.3  | 1434.74 | cpd:C12158 | Myxalamid A                             |
| KEGG/MASSBANK | 403.2  | 1029.75 | cpd:C12221 | Myxochelin B                            |
| KEGG/MASSBANK | 487.2  | 670.58  | cpd:C15674 | Myxothiazol A                           |
| KEGG/MASSBANK | 274.13 | 849.11  | cpd:C03296 | N2-Succinyl-L-arginine                  |
| KEGG/MASSBANK | 188.12 | 391.28  | cpd:C02727 | N6-Acetyl-L-lysine                      |
| KEGG/MASSBANK | 481.25 | 707.84  | cpd:C11361 | N-Acetylleukotriene E4                  |
| KEGG/MASSBANK | 494.13 | 659.77  | cpd:C03709 | N-Adenylyl-L-phenylalanine              |
| KEGG/MASSBANK | 128.06 | 88      | cpd:C00829 | Naphthalene                             |
| KEGG/MASSBANK | 307.07 | 123.75  | cpd:C08533 | Narciclasine                            |
| KEGG/MASSBANK | 278.14 | 1074.16 | cpd:C03001 | N-Benzoyl-D-arginine                    |
| KEGG/MASSBANK | 620.25 | 1445.68 | cpd:C20138 | N-Demethylansamitocin P-3               |
| KEGG/MASSBANK | 303.02 | 76.39   | cpd:C12862 | Nedaplatin                              |
| KEGG/MASSBANK | 414.17 | 716.14  | cpd:C10707 | Neoisostegane                           |
| KEGG/MASSBANK | 266.12 | 677.88  | cpd:C07263 | Nevirapine                              |
| KEGG/MASSBANK | 251.08 | 462.3   | cpd:C02564 | N-Feruloylglycine                       |
| KEGG/MASSBANK | 143.02 | 1753.22 | cpd:C18232 | N-Formylmaleamic acid                   |
| KEGG/MASSBANK | 334.06 | 87.32   | cpd:C00455 | Nicotinamide D-ribonucleotide           |
| KEGG/MASSBANK | 450.23 | 607.69  | cpd:C17030 | Nigakilactone E                         |
| KEGG/MASSBANK | 418.17 | 381.08  | cpd:C07267 | Nimodipine                              |
| KEGG/MASSBANK | 312.18 | 1007.38 | cpd:C11810 | Norajmaline                             |
| KEGG/MASSBANK | 511.19 | 671.56  | cpd:C19139 | Norbormide                              |
| KEGG/MASSBANK | 173.12 | 1126.81 | cpd:C15476 | Norselegiline                           |
| KEGG/MASSBANK | 612.23 | 615.73  | cpd:C05080 | Novobiocin                              |
| KEGG/MASSBANK | 231.01 | 115.41  | cpd:C03624 | N-Phosphohypotaurocyamine               |
| KEGG/MASSBANK | 362.05 | 111.54  | cpd:C13833 | NS 1619                                 |
| KEGG/MASSBANK | 390.07 | 111.25  | cpd:C20684 | O-Carbamoyladenylate                    |
| KEGG/MASSBANK | 283.29 | 1540.92 | cpd:C13846 | Octadecanamide                          |
| KEGG/MASSBANK | 144.1  | 982.17  | cpd:C06423 | Octanoic acid                           |
| KEGG/MASSBANK | 129.15 | 1722.81 | cpd:C01740 | Octylamine                              |
| KEGG/MASSBANK | 804.5  | 1408.43 | cpd:C01945 | Okadaic acid                            |
| KEGG/MASSBANK | 632.39 | 1351.91 | cpd:C08964 | Oleanoic acid 3-O-glucuronide           |
| KEGG/MASSBANK | 790.52 | 1537.23 | cpd:C11311 | Oligomycin A                            |
| KEGG/MASSBANK | 368.03 | 112.85  | cpd:C01103 | Orotidine 5'-phosphate                  |
| KEGG/MASSBANK | 97.98  | 102.71  | cpd:C00009 | Orthophosphate                          |
| KEGG/MASSBANK | 204.03 | 77.41   | cpd:C05533 | Oxaloglutarate                          |
| KEGG/MASSBANK | 496.12 | 655.31  | cpd:C13055 | Oxytetracycline hydrochloride           |
| KEGG/MASSBANK | 439.22 | 728.01  | cpd:C10357 | Parsonsine                              |
| KEGG/MASSBANK | 134.04 | 88.47   | cpd:C06575 | p-Cymene                                |
| KEGG/MASSBANK | 188.09 | 710.9   | cpd:C10733 | Peganine                                |
| KEGG/MASSBANK | 579.15 | 284.04  | cpd:C16368 | Pelargonidin 3-(6-p-coumaroyl)glucoside |

|               |        |         |            |                                                        |
|---------------|--------|---------|------------|--------------------------------------------------------|
| KEGG/MASSBANK | 579.17 | 686.13  | cpd:C12644 | Pelargonidin 3-O-rutinoside                            |
| KEGG/MASSBANK | 599.32 | 1124.3  | cpd:C20597 | Penitrem E 5-dicarboxylate                             |
| KEGG/MASSBANK | 248.11 | 682.04  | cpd:C07423 | Pentobarbital s 6-dicarboxylic acid                    |
| KEGG/MASSBANK | 479.1  | 687.96  | cpd:C12139 | Petunidin 3-O-glucoside                                |
| KEGG/MASSBANK | 266.06 | 1127.25 | cpd:C18252 | Phenanthrene-4                                         |
| KEGG/MASSBANK | 268.05 | 1720.21 | cpd:C12119 | Phenazine-1                                            |
| KEGG/MASSBANK | 121.09 | 169.47  | cpd:C05332 | Phenethylamine                                         |
| KEGG/MASSBANK | 94.04  | 77.67   | cpd:C00146 | Phenol                                                 |
| KEGG/MASSBANK | 174.01 | 100.12  | cpd:C02734 | Phenolic phosphate                                     |
| KEGG/MASSBANK | 167.04 | 87.6    | cpd:C03719 | Phenylacetothiohydroximate                             |
| KEGG/MASSBANK | 122.05 | 108.02  | cpd:C16200 | Phenylboronic acid                                     |
| KEGG/MASSBANK | 206.1  | 1014.04 | cpd:C07499 | Phenylethylmalonamide                                  |
| KEGG/MASSBANK | 592.27 | 1460.26 | cpd:C18021 | Pheophorbide a                                         |
| KEGG/MASSBANK | 870.57 | 1676.14 | cpd:C05797 | Pheophytin a                                           |
| KEGG/MASSBANK | 211.04 | 145.89  | cpd:C02305 | Phosphocreatine                                        |
| KEGG/MASSBANK | 96.99  | 87.16   | cpd:C02306 | Phosphoramidate                                        |
| KEGG/MASSBANK | 254.09 | 95.32   | cpd:C16584 | p-Hydroxyfelbamate                                     |
| KEGG/MASSBANK | 183.04 | 209.72  | cpd:C17239 | p-Hydroxyphenylacetothiohydroximate                    |
| KEGG/MASSBANK | 450.35 | 1564.34 | cpd:C02059 | Phylloquinone                                          |
| KEGG/MASSBANK | 317.29 | 1104.18 | cpd:C12144 | Phytosphingosine                                       |
| KEGG/MASSBANK | 376.27 | 1355.34 | cpd:C20764 | Phytyl phosphate                                       |
| KEGG/MASSBANK | 414.13 | 105.98  | cpd:C10871 | Picropodophyllin                                       |
| KEGG/MASSBANK | 248.15 | 1728.72 | cpd:C07445 | Pindolol N-(Dimethylamino)phenyldiazonium fluoroborate |
| KEGG/MASSBANK | 212.08 | 85.44   | cpd:C01745 | Pinosylvin                                             |
| KEGG/MASSBANK | 83.07  | 122.82  | cpd:C06181 | Piperideine                                            |
| KEGG/MASSBANK | 235.09 | 105.85  | cpd:C13681 | p-N                                                    |
| KEGG/MASSBANK | 374.11 | 129.12  | cpd:C08565 | Portulacaxanthin II                                    |
| KEGG/MASSBANK | 578.36 | 1305.43 | cpd:C13554 | Prednisolone 21-all-cis-farnesylate                    |
| KEGG/MASSBANK | 576.13 | 749.09  | cpd:C10237 | Proanthocyanidin A2                                    |
| KEGG/MASSBANK | 235.17 | 1214.69 | cpd:C07401 | Procainamide                                           |
| KEGG/MASSBANK | 257.13 | 847     | cpd:C07376 | Procarbazine hydrochloride                             |
| KEGG/MASSBANK | 347.11 | 113.85  | cpd:C19065 | Profluralin                                            |
| KEGG/MASSBANK | 229.15 | 107.32  | cpd:C11707 | Pronethalol                                            |
| KEGG/MASSBANK | 60     | 1790.12 | cpd:C01845 | Propan-2-ol                                            |
| KEGG/MASSBANK | 58.04  | 8.92    | cpd:C00479 | Propanal                                               |
| KEGG/MASSBANK | 60.06  | 58.26   | cpd:C05979 | Propane-1-ol                                           |
| KEGG/MASSBANK | 443.12 | 646.8   | cpd:C18886 | Propaquizafop                                          |
| KEGG/MASSBANK | 476.39 | 1630.6  | cpd:C20716 | Protopanaxatriol                                       |
| KEGG/MASSBANK | 428.18 | 701.52  | cpd:C08951 | Pseudorhodomyrtoxin                                    |
| KEGG/MASSBANK | 862.5  | 1410.29 | cpd:C09233 | Psychotridine                                          |
| KEGG/MASSBANK | 594.18 | 671.99  | cpd:C07389 | Pyrantel pamoate                                       |
| KEGG/MASSBANK | 169    | 117.83  | cpd:C00314 | Pyridoxine                                             |
| KEGG/MASSBANK | 221.09 | 105.77  | cpd:C02587 | Pyrimidodiazepine                                      |
| KEGG/MASSBANK | 88     | 1781.24 | cpd:C00022 | Pyruvate                                               |
| KEGG/MASSBANK | 302    | 79.58   | cpd:C00389 | Quercetin                                              |
| KEGG/MASSBANK | 364.24 | 1154.63 | cpd:C07619 | Quinestrol                                             |
| KEGG/MASSBANK | 372.09 | 407.64  | cpd:C18530 | Quizalofop-ethyl                                       |
| KEGG/MASSBANK | 228.03 | 99.81   | cpd:C16457 | Radium-228                                             |
| KEGG/MASSBANK | 626.27 | 1168.57 | cpd:C18022 | Red chlorophyll catabolite                             |
| KEGG/MASSBANK | 388.21 | 633.96  | cpd:C17452 | Rehmaionoside C                                        |

|               |        |         |            |                                       |
|---------------|--------|---------|------------|---------------------------------------|
| KEGG/MASSBANK | 229.04 | 94.38   | cpd:C11178 | Resazurin                             |
| KEGG/MASSBANK | 608.27 | 1440.12 | cpd:C06539 | Reserpine                             |
| KEGG/MASSBANK | 228.08 | 1142.61 | cpd:C03582 | Resveratrol 5'-phosphate              |
| KEGG/MASSBANK | 316.06 | 712.21  | cpd:C10176 | Rhamnetin                             |
| KEGG/MASSBANK | 376.14 | 650.73  | cpd:C00255 | Riboflavin                            |
| KEGG/MASSBANK | 438.1  | 632.55  | cpd:C16071 | Riboflavin cyclic-4'                  |
| KEGG/MASSBANK | 822.41 | 1155.2  | cpd:C06688 | Rifampicin                            |
| KEGG/MASSBANK | 516.16 | 100.66  | cpd:C18235 | S-(Hydroxymethyl)mycothiol            |
| KEGG/MASSBANK | 400.11 | 104.08  | cpd:C03725 | S-Acetylphosphopantetheine            |
| KEGG/MASSBANK | 122.04 | 353.96  | cpd:C06202 | Salicylaldehyde                       |
| KEGG/MASSBANK | 138.03 | 353.95  | cpd:C00805 | Salicylate                            |
| KEGG/MASSBANK | 436.15 | 108.48  | cpd:C17869 | Sanggenon A                           |
| KEGG/MASSBANK | 394.17 | 604.81  | cpd:C12228 | Sanguilutine                          |
| KEGG/MASSBANK | 402.12 | 95.61   | cpd:C12311 | Saphenamycin                          |
| KEGG/MASSBANK | 594.16 | 710.5   | cpd:C08064 | Saponarin                             |
| KEGG/MASSBANK | 504.16 | 86.9    | cpd:C08782 | Sergeolide                            |
| KEGG/MASSBANK | 279.18 | 1149.93 | cpd:C09901 | Serratine                             |
| KEGG/MASSBANK | 426.09 | 653.26  | cpd:C05526 | S-Glutathionyl-L-cysteine             |
| KEGG/MASSBANK | 215.99 | 98.55   | cpd:C04399 | S-Methyl-3-phospho-1-thio-D-glycerate |
| KEGG/MASSBANK | 106.01 | 408.83  | cpd:C03173 | S-Methylthioglycolate                 |
| KEGG/MASSBANK | 495.15 | 109.83  | cpd:C17731 | Sodium folinate                       |
| KEGG/MASSBANK | 160.01 | 79.59   | cpd:C07587 | Sodium salicylate                     |
| KEGG/MASSBANK | 218    | 1794.66 | cpd:C09737 | Solavetivone                          |
| KEGG/MASSBANK | 458.38 | 1360.63 | cpd:C08980 | Soyasapogenol B                       |
| KEGG/MASSBANK | 494.4  | 1618.25 | cpd:C20475 | Sporulenol                            |
| KEGG/MASSBANK | 627.46 | 1537.4  | cpd:C16841 | Squalamine                            |
| KEGG/MASSBANK | 267.08 | 105.75  | cpd:C03539 | S-Ribosyl-L-homocysteine              |
| KEGG/MASSBANK | 436.26 | 695.43  | cpd:C03805 | Stearoylglycerone phosphate           |
| KEGG/MASSBANK | 252.2  | 1354.34 | cpd:C17502 | Sugetriol                             |
| KEGG/MASSBANK | 128.1  | 126.42  | cpd:C07288 | Sulcatol                              |
| KEGG/MASSBANK | 332.06 | 103.08  | cpd:C18386 | Sulfadimethoxine sodium               |
| KEGG/MASSBANK | 280.06 | 100.78  | cpd:C12616 | Sulfamethopyrazine                    |
| KEGG/MASSBANK | 260.05 | 91.81   | cpd:C07320 | Suprofen                              |
| KEGG/MASSBANK | 481.13 | 109     | cpd:C11751 | Talampicillin                         |
| KEGG/MASSBANK | 448.36 | 1634.01 | cpd:C15791 | Teasterone                            |
| KEGG/MASSBANK | 582.1  | 81.64   | cpd:C12040 | Telomestatin                          |
| KEGG/MASSBANK | 288.04 | 110.24  | cpd:C18693 | Terbufos                              |
| KEGG/MASSBANK | 246    | 81.24   | cpd:C18240 | Tetrachlorocatechol                   |
| KEGG/MASSBANK | 228.2  | 1404.34 | cpd:C06424 | Tetradecanoic acid                    |
| KEGG/MASSBANK | 188.03 | 94.86   | cpd:C20385 | Tetranorbiotin                        |
| KEGG/MASSBANK | 243.95 | 1725.9  | cpd:C18945 | Thicyofen                             |
| KEGG/MASSBANK | 142.01 | 76.75   | cpd:C02595 | Thien-2-ylacetate                     |
| KEGG/MASSBANK | 137.03 | 87.74   | cpd:C16281 | Thiobenzamide                         |
| KEGG/MASSBANK | 248.04 | 85.32   | cpd:C19036 | Thionazin                             |
| KEGG/MASSBANK | 342.05 | 103.73  | cpd:C14432 | Thiophanate-methyl                    |
| KEGG/MASSBANK | 253.08 | 143.31  | cpd:C01619 | Thiorphan                             |
| KEGG/MASSBANK | 189.05 | 94.01   | cpd:C07641 | Thiotepa                              |
| KEGG/MASSBANK | 242.09 | 83.9    | cpd:C00214 | Thymidine                             |
| KEGG/MASSBANK | 375.13 | 84.98   | cpd:C07503 | Tiagabine                             |
| KEGG/MASSBANK | 263.05 | 91.89   | cpd:C07140 | Ticlopidine                           |

|               |        |         |            |                                               |
|---------------|--------|---------|------------|-----------------------------------------------|
| KEGG/MASSBANK | 79.94  | 1723.95 | cpd:C13409 | Titanium dioxide                              |
| KEGG/MASSBANK | 562.23 | 805.37  | cpd:C15659 | TMC 126                                       |
| KEGG/MASSBANK | 357.06 | 109.15  | cpd:C01621 | Tolrestat                                     |
| KEGG/MASSBANK | 172.02 | 91.14   | cpd:C06677 | Toluene-4-sulfonate                           |
| KEGG/MASSBANK | 849.52 | 1529.98 | cpd:C16904 | Tolytoxin                                     |
| KEGG/MASSBANK | 193.06 | 214.39  | cpd:C16789 | Toxoflavine                                   |
| KEGG/MASSBANK | 228.1  | 111.57  | cpd:C16308 | Traumatic acid                                |
| KEGG/MASSBANK | 528.16 | 649.54  | cpd:C09973 | Tremulacin                                    |
| KEGG/MASSBANK | 294.04 | 109.97  | cpd:C10406 | Tricrozarin A                                 |
| KEGG/MASSBANK | 189.04 | 175.37  | cpd:C18492 | Tricyclazole                                  |
| KEGG/MASSBANK | 318.28 | 1351.59 | cpd:C07861 | Tridihexethyl                                 |
| KEGG/MASSBANK | 562.25 | 695.42  | cpd:C09669 | Trilobine                                     |
| KEGG/MASSBANK | 298.15 | 1190.38 | cpd:C07172 | Trimeprazine                                  |
| KEGG/MASSBANK | 398.24 | 1242.85 | cpd:C14446 | Tris(butoxyethyl)phosphate                    |
| KEGG/MASSBANK | 141.12 | 1444.46 | cpd:C00729 | Tropine                                       |
| KEGG/MASSBANK | 394.27 | 1539.4  | cpd:C12000 | Tylactone                                     |
| KEGG/MASSBANK | 687.05 | 74.98   | cpd:C20245 | UDP-N-acetyl-alpha-D-glucosamine 3'-phosphate |
| KEGG/MASSBANK | 162.03 | 137.18  | cpd:C09315 | Umbelliferone                                 |
| KEGG/MASSBANK | 393.28 | 1360.3  | cpd:C12023 | Undecylprodigiosin                            |
| KEGG/MASSBANK | 112    | 93.52   | cpd:C00106 | Uracil                                        |
| KEGG/MASSBANK | 168.03 | 1777.11 | cpd:C00366 | Urate                                         |
| KEGG/MASSBANK | 450.28 | 1346.79 | cpd:C09250 | Usambarine                                    |
| KEGG/MASSBANK | 234.16 | 1214.47 | cpd:C09743 | Valerenic acid                                |
| KEGG/MASSBANK | 168.04 | 90.29   | cpd:C06672 | Vanillate                                     |
| KEGG/MASSBANK | 454.28 | 1175.86 | cpd:C07188 | Verapamil                                     |
| KEGG/MASSBANK | 408.18 | 662.42  | cpd:C09579 | Vernoflexuoside                               |
| KEGG/MASSBANK | 364.04 | 102.84  | cpd:C00655 | Xanthosine 5'-phosphate                       |
| KEGG/MASSBANK | 152    | 90.16   | cpd:C00379 | Xylitol                                       |
| KEGG/MASSBANK | 244.19 | 1236.83 | cpd:C07913 | Xylometazoline                                |
| KEGG/MASSBANK | 412.11 | 109.38  | cpd:C07568 | Ziprasidone                                   |

Tables S2. The metabolomic pathways associated with wet and dry season. The influence of the pathways and the suprafamily are indicated by the arrows. ↑ for 0.3-0.5 values in loadings of the PCA, ↑↑ for 0.5-0.8 values, ↑↑↑ for >0.8 values. ↓ for -0.3--0.5 values, ↓↓ for -0.5--0.8 values, ↓↓↓ for <-0.8 values. The categories of the suprafamily and the metabolomic pathway are based on the KEGG service.

|                                             | Season                                                     | DRY | WET |
|---------------------------------------------|------------------------------------------------------------|-----|-----|
| Suprafamily                                 | Metabolomic Pathway                                        |     |     |
| Amino acid metabolism                       | Tyrosine metabolism                                        | -   | ↑↑↑ |
| Amino acid metabolism                       | Lysine biosynthesis                                        | -   | ↑↑↑ |
| Amino acid metabolism                       | Cysteine and methionine metabolism                         | -   | ↑   |
| Biosynthesis of other secondary metabolites | Isoflavonoid biosynthesis                                  | ↓↓↓ | ↑↑↑ |
| Biosynthesis of other secondary metabolites | Isoquinoline alkaloid biosynthesis                         | ↓↓  | ↑↑  |
| Biosynthesis of other secondary metabolites | Indole alkaloid biosynthesis                               | ↓↓  | ↑↑  |
| Biosynthesis of other secondary metabolites | Indole diterpene alkaloid biosynthesis                     | -   | -   |
| Biosynthesis of other secondary metabolites | Caffeine metabolism                                        | -   | -   |
| Biosynthesis of other secondary metabolites | Streptomycin biosynthesis                                  | ↓   | ↑   |
| Biosynthesis of other secondary metabolites | Anthocyanin biosynthesis                                   | -   | ↑   |
| Carbohydrate metabolism                     | Galactose metabolism                                       | ↑   | -   |
| Carbohydrate metabolism                     | Starch and sucrose metabolism                              | ↑   | -   |
| Carbohydrate metabolism                     | Pentose phosphate pathway                                  | ↑↑  | -   |
| Carbohydrate metabolism                     | Propanoate metabolism                                      | ↓   | ↓↓↓ |
| Carbohydrate metabolism                     | Glyoxylate and dicarboxylate metabolism                    | ↑   | -   |
| Carbohydrate metabolism                     | Pyruvate metabolism                                        | -   | ↓↓  |
| Energy metabolism                           | Carbon fixation pathways in prokaryotes                    | ↓↓↓ | -   |
| Energy metabolism                           | Carbon fixation in photosynthetic organisms                | ↑↑  | -   |
| Energy metabolism                           | Sulfur metabolism                                          | -   | ↓↓↓ |
| Glycan biosynthesis and metabolism          | Glycosaminoglycan biosynthesis - heparan sulfate / heparin | -   | ↓↓↓ |
| Lipid metabolism                            | Fatty acid biosynthesis                                    | ↑↑↑ | ↑   |
| Lipid metabolism                            | Biosynthesis of unsaturated fatty acids                    | ↑↑  | ↓   |
| Lipid metabolism                            | Linoleic acid metabolism                                   | ↑↑↑ | -   |
| Lipid metabolism                            | Steroid biosynthesis                                       | ↑↑  | -   |
| Metabolism of cofactors and vitamins        | One carbon pool by folate                                  | ↓↓↓ | ↑   |
| Metabolism of other amino acids             | D-Alanine metabolism                                       | ↑↑  | ↓   |
| Metabolism of other amino acids             | Taurine and hypotaurine metabolism                         | -   | ↓↓  |
| Metabolism of other amino acids             | Selenocompound metabolism                                  | ↑↑  | ↓   |
| Metabolism of other amino acids             | D-Arginine and D-ornithine metabolism                      | -   | -   |
| Metabolism of other amino acids             | Glutathione metabolism                                     | -   | -   |
| Metabolism of terpenoids and polyketides    | Biosynthesis of type II polyketide products                | ↓↓  | ↑↑↑ |
| Metabolism of terpenoids and polyketides    | Zeatin biosynthesis                                        | -   | ↓↓↓ |
| Metabolism of terpenoids and polyketides    | Biosynthesis of ansamycins                                 | ↓   | ↑↑  |
| Metabolism of terpenoids and polyketides    | Biosynthesis of 12-, 14- and 16-membered macrolides        | ↓   | ↑   |
| Metabolism of terpenoids and polyketides    | Tetracycline biosynthesis                                  | -   | ↑   |
| Metabolism of terpenoids and polyketides    | Biosynthesis of vancomycin group antibiotics               | -   | -   |
| Nucleotide metabolism                       | Pyrimidine metabolism                                      | ↓   | ↑   |
| Xenobiotics biodegradation and metabolism   | Ethylbenzene degradation                                   | ↓↓  | ↑↑  |
| Xenobiotics biodegradation and metabolism   | Toluene degradation                                        | -   | ↑↑  |
| Xenobiotics biodegradation and metabolism   | Chloroalkane and chloroalkene degradation                  | ↓↓  | ↑↑  |
| Xenobiotics biodegradation and metabolism   | DDT degradation                                            | ↑   | ↓↓  |
| Xenobiotics biodegradation and metabolism   | Dioxin degradation                                         | ↓↓  | ↑↑  |

|                                           |                                                 |    |    |
|-------------------------------------------|-------------------------------------------------|----|----|
| Xenobiotics biodegradation and metabolism | Metabolism of xenobiotics by cytochrome P450    | ↓↓ | ↑↑ |
| Xenobiotics biodegradation and metabolism | Caprolactam degradation                         | -  | ↑  |
| Xenobiotics biodegradation and metabolism | Atrazine degradation                            | ↑↑ | -  |
| Xenobiotics biodegradation and metabolism | Xylene degradation                              | -  | -  |
| Xenobiotics biodegradation and metabolism | Chlorocyclohexane and chlorobenzene degradation | -  | ↓  |
| Xenobiotics biodegradation and metabolism | Nitrotoluene degradation                        | ↓↓ | -  |



Table S3. Species analyzed in this study

| <b>Order</b> | <b>Family</b>    | <b>Genus</b>         | <b>Species</b>         | <b>LegSp</b> |
|--------------|------------------|----------------------|------------------------|--------------|
| Lurales      | Lauraceae        | <i>Aniba</i>         | <i>rosaeodora</i>      | Aro          |
| Apiales      | Opiliaceae       | <i>Agonandra</i>     | <i>silvatica</i>       | Asi          |
| Fabales      | Fabaceae         | <i>Alexa</i>         | <i>wachenheimii</i>    | Awa          |
| Rosales      | Moraceae         | <i>Brosimum</i>      | <i>guianense</i>       | Bgu          |
| Fabales      | Fabaceae         | <i>Bocoa</i>         | <i>prouacensis</i>     | Bpr          |
| Rosales      | Moraceae         | <i>Brosimum</i>      | <i>rubescens</i>       | Bru          |
| Ericales     | Sapotaceae       | <i>Chrysophyllum</i> | <i>argenteum</i>       | Car          |
| Rosales      | Chrysobalanaceae | <i>Couepia</i>       | <i>caryophylloides</i> | Cca          |
| Gentianales  | Rubiaceae        | <i>Capirona</i>      | <i>decorticans</i>     | Cde          |
| Malvales     | Malvaceae        | <i>Catostemma</i>    | <i>fragrans</i>        | Cfr          |
| Malpighiales | Caryocaraceae    | <i>Caryocar</i>      | <i>glabrum</i>         | Cgl          |
| Ericales     | Sapotaceae       | <i>Chrysophyllum</i> | <i>sanguinolentum</i>  | Csa          |
| Malpighiales | Euphorbiaceae    | <i>Chaetocarpus</i>  | <i>chomburgkianu.</i>  | Csc          |
| Sapindales   | Meliaceae        | <i>Carapa</i>        | <i>surispemensis</i>   | Csu          |
| Gentianales  | Rubiaceae        | <i>Chimarrhis</i>    | <i>turbispeta</i>      | Ctu          |
| Fabales      | Fabaceae         | <i>Dicorynia</i>     | <i>guianensis</i>      | Dgu          |
| Fabales      | Fabaceae         | <i>Dipteryx</i>      | <i>odorata</i>         | Dod          |
| Malpighiales | Putranjivaceae   | <i>Drypetes</i>      | <i>variabilis</i>      | Dva          |
| Ericales     | Lecythydaceae    | <i>Eschweilera</i>   | <i>coriacea</i>        | Eco          |
| Ericales     | Lecythydaceae    | <i>Eschweilera</i>   | <i>decolorans</i>      | Ede          |
| Fabales      | Fabaceae         | <i>Eperua</i>        | <i>falcata</i>         | Efa          |
| Fabales      | Fabaceae         | <i>Eperua</i>        | <i>grandiflora</i>     | Egr          |
| Gentianales  | Rubiaceae        | <i>Ferdinandusa</i>  | <i>paraensis</i>       | Fpa          |
| Malpighiales | Goupiaceae       | <i>Goupia</i>        | <i>glabra</i>          | Ggl          |
| Ericales     | Lecythydaceae    | <i>Gustavia</i>      | <i>hexapetala</i>      | Ghe          |
| Rosales      | Chrysobalanaceae | <i>Hirtella</i>      | <i>bicornis</i>        | Hbi          |
| Fabales      | Fabaceae         | <i>hymanea</i>       | <i>courbaril</i>       | Hco          |
| Malpighiales | Linaceae         | <i>Hebepetalum</i>   | <i>humirifolium</i>    | Hhu          |
| Rosales      | Moraceae         | <i>Helicostylis</i>  | <i>pedunculata</i>     | Hpe          |
| Fabales      | Fabaceae         | <i>Inga</i>          | <i>nouraguensis</i>    | Ino          |
| Magnoliales  | Myristicaceae    | <i>Iryanthera</i>    | <i>sagotiaspe</i>      | Isa          |
| Rosales      | Chrysobalanaceae | <i>Licania</i>       | <i>alba</i>            | Lal          |
| Rosales      | Chrysobalanaceae | <i>Licania</i>       | <i>densiflora</i>      | Lde          |
| Ericales     | Lecythydaceae    | <i>Lecythis</i>      | <i>idatimon</i>        | Lid          |
| Malvales     | Malvaceae        | <i>Lueheopsis</i>    | <i>rugosa</i>          | Lru          |
| Malpighiales | Clusiaceae       | <i>Moronobea</i>     | <i>coccinea</i>        | Mco          |
| Myrtales     | Myrtaceae        | <i>Myrcia</i>        | <i>splendens</i>       | Msp          |
| Ericales     | Sapotaceae       | <i>Micropholis</i>   | <i>venulosa</i>        | Mve          |
| Magnoliales  | Annonaceae       | <i>Oxandra</i>       | <i>asbeckii</i>        | Oas          |
| Magnoliales  | Myristicaceae    | <i>Osteophleum</i>   | <i>platyspermum</i>    | Opl          |
| Sapindales   | Burseraceae      | <i>Protium</i>       | <i>decandrum</i>       | Pde          |
| Ericales     | Sapotaceae       | <i>Pouteria</i>      | <i>eugeniifolia</i>    | Peu          |
| Fabales      | Fabaceae         | <i>Paloue</i>        | <i>guianensisP</i>     | Pgu          |
| Sapindales   | Burseraceae      | <i>Protium</i>       | <i>opacum</i>          | Pop          |
| Ericales     | Sapotaceae       | <i>Pradosia</i>      | <i>ptychandra</i>      | Ppt          |
| Ericales     | Sapotaceae       | <i>Pouteria</i>      | <i>retinervis</i>      | Pre          |

|              |                 |                    |                       |     |
|--------------|-----------------|--------------------|-----------------------|-----|
| Poales       | Peraceae        | <i>Pogonophora</i> | <i>chomburgkiaspe</i> | Psc |
| Malpighiales | Clusiaceae      | <i>Symphonia</i>   | <i>globulifera</i>    | Sgl |
| Malvales     | Malvaceae       | <i>Sterculia</i>   | <i>pruriens</i>       | Spr |
| Lurales      | Lauraceae       | <i>Sextonia</i>    | <i>rubra</i>          | Sru |
| Malpighiales | Dichapetalaceae | <i>Tapura</i>      | <i>capitulifera</i>   | Tca |
| Sapindales   | Sapindaceae     | <i>Talisia</i>     | <i>praealta</i>       | Tpr |
| Fabales      | Fabaceae        | <i>Vouacapoua</i>  | <i>americaspe</i>     | Vam |
| Myrtales     | Vochysiaceae    | <i>Vochysia</i>    | <i>sabatieri</i>      | Vsa |
